# Supplementary material
Source: PubMed Central journal article supplement (PMC3302299)
Supplement: supp_86.6.2970_FigS1.pdf [file supp_86.6.2970_FigS1.pdf]

|                      |                                                                                  |     |
|----------------------|----------------------------------------------------------------------------------|-----|
| Majority             | MEGPAFSKPLKDKINPWGPLIVIGILVRAGASVQRDSPHQVFNVWTRVTNLMTGQTANATSLTGTMTDTPKLYFDLCDL  |     |
|                      | 10 20 30 40 50 60 70 80                                                          |     |
| N417_env_translation | MEGPAFSKPLKDKINPWGPLIVIGILVRAGASVQRDSPHQVFNVWTRVTNLMTGQTANATSLTGTMTDTPKLYFDLCDL  | 80  |
| JY_env_translation   | MEGPAFSKPLKDKINPWGPLIVIGILVRAGASVQRDSPHQVFNVWTRVTNLMTGQTANATSLTGTMTDTPKLYFDLCDL  | 80  |
| Majority             | VGDHWDDPEPDIGDGRSPGGRRKRLRYDFYVCPGHTVPIGCGGPGEGYCGKWGCETTQAYWKPSSSWDLISLKRGNTP   |     |
|                      | 90 100 110 120 130 140 150 160                                                   |     |
| N417_env_translation | VGDHWDDPEPDIGDGRSPGGRRKRLRYDFYVCPGHTVPIGCGGPGEGYCGKWGCETTQAYWKPSSSWDLISLKRGNTP   | 160 |
| JY_env_translation   | VGDHWDDPEPDIGDGRSPGGRRKRLRYDFYVCPGHTVPIGCGGPGEGYCGKWGCETTQAYWKPSSSWDLISLKRGNTP   | 160 |
| Majority             | KDQGPCYDSSVSSGVQGATPGGRCNPLVLEFTDAGKKASWDAPKVVGLRLYRSTGADPVTRFSLTRQVLNVGPRVPIGPN |     |
|                      | 170 180 190 200 210 220 230 240                                                  |     |
| N417_env_translation | KDQGPCYDSSVSSGVQGATPGGRCNPLVLEFTDAGKKASWDAPKVVGLRLYRSTGADPVTRFSLTRQVLNVGPRVPIGPN | 240 |
| JY_env_translation   | KDQGPCYDSSVSSGVQGATPGGRCNPLVLEFTDAGKKASWDAPKVVGLRLYRSTGADPVTRFSLTRQVLNVGPRVPIGPN | 240 |
| Majority             | PVITEQLPPSQPVQIMLPRPPHPPPSGAASMVPGAPPSQQPGTGDRLLNLVKGAYQALNLTPDRTQECWLCLVSGPPY   |     |
|                      | 250 260 270 280 290 300 310 320                                                  |     |
| N417_env_translation | PVITEQLPPSQPVQIMLPRPPHPPPSGAASMVPGAPPSQQPGTGDRLLNLVKGAYQALNLTPDRTQECWLCLVSGPPY   | 320 |
| JY_env_translation   | PVITEQLPPSQPVQIMLPRPPHPPPSGAASMVPGAPPSQQPGTGDRLLNLVKGAYQALNLTPDRTQECWLCLVSGPPY   | 320 |
| Majority             | YEGVAVLGTYSNHTSAPANCSVASQHKLTLSEVTGGQLCVGAVPKTHQALCNTTQKASDGSYYLAAPAGTIWACNTGLTP |     |
|                      | 330 340 350 360 370 380 390 400                                                  |     |
| N417_env_translation | YEGVAVLGTYSNHTSAPANCSVASQHKLTLSEVTGGQLCVGAVPKTHQALCNTTQKASDGSYYLAAPAGTIWACNTGLTP | 400 |
| JY_env_translation   | YEGVAVLGTYSNHTSAPANCSVASQHKLTLSEVTGGQLCVGAVPKTHQALCNTTQKASDGSYYLAAPAGTIWACNTGLTP | 400 |
| Majority             | CLSTTVLNLTTDYCVLVELWPKVYHSPGYVYDQFERKTKYKREPVSLLALLLGGTIMGIAAGVGTGTTALVATKQFE    |     |
|                      | 410 420 430 440 450 460 470 480                                                  |     |
| N417_env_translation | CLSTTVLNLTTDYCVLVELWPKVYHSPGYVYDQFERKTKYKREPVSLLALLLGGTIMGIAAGVGTGTTALVATKQFE    | 480 |
| JY_env_translation   | CLSTTVLNLTTDYCVLVELWPKVYHSPGYVYDQFERKTKYKREPVSLLALLLGGTIMGIAAGVGTGTTALVATKQFE    | 480 |
| Majority             | QLQAAIHTDLGALEKSVSALEKSLTSLSEVVLQNRRLDLLFLKEGGLCAALKEECCFYADHTGVVRDSMAKLRERLNQR  |     |
|                      | 490 500 510 520 530 540 550 560                                                  |     |
| N417_env_translation | QLQAAIHTDLGALEKSVSALEKSLTSLSEVVLQNRRLDLLFLKEGGLCAALKEECCFYADHTGVVRDSMAKLRERLNQR  | 560 |
| JY_env_translation   | QLQAAIHTDLGALEKSVSALEKSLTSLSEVVLQNRRLDLLFLKEGGLCAALKEECCFYADHTGVVRDSMAKLRERLNQR  | 560 |
| Majority             | QKLFESGQGWFEGLFNRSPWFTTLISTIMGPLIVLLXXXXXXXXXXXXXXXXXXXXXXXXXXXXXXXXXXXXXXXXXXXX |     |
|                      | 570 580 590 600 610 620 630 640                                                  |     |
| N417_env_translation | QKLFESGQGWFEGLFNRSPWFTTLISTIMGPLIVLLIILLLGPCILNRLVQFVKDRISVVQALVLTQQYHQLKSIDPEEV | 640 |
| JY_env_translation   | QKLFESGQGWFEGLFNRSPWFTTLISTIMGPLIVLL-----SYSSDPAFSTAWSSL-----                    | 611 |
| Majority             | XXXX-                                                                            |     |
| N417_env_translation | ESRE.                                                                            | 645 |
| JY_env_translation   | ----                                                                             | 612 |
