# Supplementary material
Source: PubMed Central journal article supplement (PMC3302299)
Supplement: supp_86.6.2970_FigS2.pdf [file supp_86.6.2970_FigS2.pdf]

Majority GCGCCAGTCATCCGATAGACTGAGTCGCCCGGTACCCGTGTTCCAATAAAGCCTTTTGCTGTTTGCATCCGAAACGTG  
10 20 30 40 50 60 70 80

JY\_MuLV GCGCCAGTCATCCGATAGACTGAGTCGCCCGGTACCCGTGTTCCAATAAAGCCTTTTGCTGTTTGCATCCGAAACGTG 80  
N417\_MuLV HQ246218 GCGCCAGTCATCCGATAGACTGAGTCGCCCGGTACCCGTGTTCCAATAAAGCCTTTTGCTGTTTGCATCCGAAACGTG 80  
DG75\_MuLV AF221065 GCGCCAGTCATCCGATAGACTGAGTCGCCCGGTACCCGTGTTCCAATAAAGCCTTTTGCTGTTTGCATCCGAAACGTG 80  
VP62\_XMRV DQ399707 GCGCCAGTCATCCGATAGACTGAGTCGCCCGGTACCCGTGTTCCAATAAAGCCTTTTGCTGTTTGCATCCGAAACGTG 80  
MCF1233\_MuLV U13766 GCGCCAGTCATCCGATAGACTGAGTCGCCCGGTACCCGTGTTCCAATAAAGCCTTTTGCTGTTTGCATCCGAAACGTG 80

Majority GCCTCGCTGTTCTTGGGAGGGTCTCCTCAGAGTGATTGACTACCCAGCTCGGGGGTCTTTCATTTGGGGGCTCGTCCGG  
90 100 110 120 130 140 150 160

JY\_MuLV GCCTCGCTGTTCTTGGGAGGGTCTCCTCAGAGTGATTGACTACCCAGCTCGGGGGTCTTTCATTTGGGGGCTCGTCCGG 160  
N417\_MuLV HQ246218 GCCTCGCTGTTCTTGGGAGGGTCTCCTCAGAGTGATTGACTACCCAGCTCGGGGGTCTTTCATTTGGGGGCTCGTCCGG 160  
DG75\_MuLV AF221065 GTCTCGCTGTTCTTGGGAGGGTCTCCTCAGAGTGATTGACTACCCAGCTCGGGGGTCTTTCATTTGGGGGCTCGTCCGG 160  
VP62\_XMRV DQ399707 GCCTCGCTGTTCTTGGGAGGGTCTCCTCAGAGTGATTGACTACCCAGCTCGGGGGTCTTTCATTTGGGGGCTCGTCCGG 160  
MCF1233\_MuLV U13766 GCCTCGCTGTTCTTGGGAGGGTCTCCTCAGAGTGATTGACTACCCAGCTCGGGGGTCTTTCATTTGGGGGCTCGTCCGG 160

Majority GATTTGGAGACCCCGCCAGGGACCACCGACCCACCGTGGGAGGTAAGCTGGCCAGCGATCGTTTTGTCTCCGTCTCT  
170 180 190 200 210 220 230 240

JY\_MuLV GATTTGGAGACCCCGCCAGGGACCACCGACCCACCGTGGGAGGTAAGCTGGCCAGCGATCGTTTTGTCTCCGTCTCT 240  
N417\_MuLV HQ246218 GATTTGGAGACCCCGCCAGGGACCACCGACCCACCGTGGGAGGTAAGCTGGCCAGCGATCGTTTTGTCTCCGTCTCT 240  
DG75\_MuLV AF221065 GATTTGGAGACCCCGCCAGGGACCACCGACCCACCGTGGGAGGTAAGCTGGCCAGCGATCGTTTTGTCTCCGTCTCT 239  
VP62\_XMRV DQ399707 GATTTGGAGACCCCGCCAGGGACCACCGACCCACCGTGGGAGGTAAGCTGGCCAGCGATCGTTTTGTCTCCGTCTCT 240  
MCF1233\_MuLV U13766 GATTTGGAGACCCCGCCAGGGACCACCGACCCACCGTGGGAGGTAAGCTGGCCAGCGATCGTTTTGTCTCCGTCTCT 239

Majority GTCTTTGTGCGTGTGTGTGTGCCGGCATCTACTTTTTGCGCCTGCGTCTGAATCTGACTAGTTAGTAACTAGATCT  
250 260 270 280 290 300 310 320

JY\_MuLV GTCTTTGTGCGTGTGTGTGTGCCGGCATCTACTTTTTGCGCCTGCGTCTGAATCTGACTAGTTAGTAACTAGATCT 320  
N417\_MuLV HQ246218 GTCTTTGTGCGTGTGTGTGTGCCGGCATCTACTTTTTGCGCCTGCGTCTGAATCTGACTAGTTAGTAACTAGATCT 320  
DG75\_MuLV AF221065 GTCTTTGTGCGTGTGTGTGTGCCGGCATCTACTTTTTGCGCCTGCGTCTGAATCTGACTAGTTAGTAACTAGATCT 309  
VP62\_XMRV DQ399707 GTCTTTGTGCGTGTGTGTGTGCCGGCATCTACTTTTTGCGCCTGCGTCTGAATCTGACTAGTTAGTAACTAGATCT 320  
MCF1233\_MuLV U13766 GTCTTTGTGCGTGTGTGTGTGCCGGCATCTACTTTTTGCGCCTGCGTCTGAATCTGACTAGTTAGTAACTAGATCT 319

Majority GTATCTGGCGTTCCTGGAAGAACTGACGAGTTCGTATTCCCGACCGCAGCCCTGGGAGACGTCTCAGAGGCATCGGGG  
330 340 350 360 370 380 390 400

JY\_MuLV GTATCTGGCGTTCCTGGAAGAACTGACGAGTTCGTATTCCCGACCGCAGCCCTGGGAGACGTCTCAGAGGCATCGGGG 400  
N417\_MuLV HQ246218 GTATCTGGCGTTCCTGGAAGAACTGACGAGTTCGTATTCCCGACCGCAGCCCTGGGAGACGTCTCAGAGGCATCGGGG 400  
DG75\_MuLV AF221065 GAATCTGGCGTTCCTGGAAGAACTGACGAGTTCGTATTCCCGACCGCAGCCCTGGGAGACGTCTCAGAGGCATCGGGG 389  
VP62\_XMRV DQ399707 GTATCTGGCGTTCCTGGAAGAACTGACGAGTTCGTATTCCCGACCGCAGCCCTGGGAGACGTCTCAGAGGCATCGGGG 400  
MCF1233\_MuLV U13766 GTATCTGGCGTTCCTGGAAGAACTGACGAGTTCGTATTCCCGACCGCAGCCCTGGGAGACGTCTCAGAGGCATCGGGG 399

Majority GCCCGTGGGTGGCCCAATCAGTAAGTCCGAGTCTGACCGATTCCGACTATTTGGAGCCCCTCCTTTGTCGGAGGGGTA  
410 420 430 440 450 460 470 480

JY\_MuLV GCCCGTGGGTGGCCCAATCAGTAAGTCCGAGTCTGACCGATTCCGACTATTTGGAGCCCCTCCTTTGTCGGAGGGGTA 480  
N417\_MuLV HQ246218 GCCCGTGGGTGGCCCAATCAGTAAGTCCGAGTCTGACCGATTCCGACTATTTGGAGCCCCTCCTTTGTCGGAGGGGTA 480  
DG75\_MuLV AF221065 GCCCGTGGGTGGCCCAATCAGTAAGTCCGAGTCTGACCGATTCCGACTATTTGGAGCCCCTCCTTTGTCGGAGGGGTA 469  
VP62\_XMRV DQ399707 GCCCGTGGGTGGCCCAATCAGTAAGTCCGAGTCTGACCGATTCCGACTATTTGGAGCCCCTCCTTTGTCGGAGGGGTA 458  
MCF1233\_MuLV U13766 GCCCGTGGGTGGCCCAATCAGTAAGTCCGAGTCTGACCGATTCCGACTATTTGGAGCCCCTCCTTTGTCGGAGGGGTA 479

Majority CGTGGTCTTTTAGGAGACGAGAGGTCCAAGCCCTCGCCGCTCCATCTGAATTTTGTTCGTTTTTCGCCGAAACC  
490 500 510 520 530 540 550 560

JY\_MuLV CGTGGTCTTTTAGGAGACGAGAGGTCCAAGCCCTCGCCGCTCCATCTGAATTTTGTTCGTTTTTCGCCGAAACC 560  
N417\_MuLV HQ246218 CGTGGTCTTTTAGGAGACGAGAGGTCCAAGCCCTCGCCGCTCCATCTGAATTTTGTTCGTTTTTCGCCGAAACC 560  
DG75\_MuLV AF221065 CGTGGTCTGTTGGGCGCGAGGGCCAAACGCTCTGTCGCCATCTGAATTTTGTTCGTTTTTCGCCGAAACC 549  
VP62\_XMRV DQ399707 ---GGCTTTGTTGGGCGACGAGAGACAGAGACTTCGCGCCCGCTCTGAATTTTGTTCGTTTTTCGCCGAAACC 535  
MCF1233\_MuLV U13766 CGTGGTCTTTTAGGAGACGAGAGGTCCAAGCCCTCGCCGCTCCATCTGAATTTTGTTCGTTTTTCGCCGAAACC 559

Majority GCGCCGCGCTTGTCTGTCTCAGTGTGTTTTGTCATTTGTCTGTTTCGTTATTGTTTTGGACCGTTTCTAAAAATAG  
570 580 590 600 610 620 630 640

JY\_MuLV GCGCCGCGCTTGTCTGTCTCAGTGTGTTTTGTCATTTGTCTGTTTCGTTATTGTTTTGGACCGTTTCTAAAAATAG 640  
N417\_MuLV HQ246218 GCGCCGCGCTTGTCTGTCTCAGTGTGTTTTGTCATTTGTCTGTTTCGTTATTGTTTTGGACCGTTTCTAAAAATAG 640  
DG75\_MuLV AF221065 GCGCCGCGCTTGTCTGTCTCAGTGTGTTTTGTCATTTGTCTGTTTCGTTATTGTTTTGGACCGTTTCTAAAAATAG 629  
VP62\_XMRV DQ399707 GCGCCGCGCTTGTCTGTCTCAGTGTGTTTTGTCATTTGTCTGTTTCGTTATTGTTTTGGACCGTTTCTAAAAATAG 615  
MCF1233\_MuLV U13766 GCGCCGCGCTTGTCTGTCTCAGTGTGTTTTGTCATTTGTCTGTTTCGTTATTGTTTTGGACCGTTTCTAAAAATAG 639

Majority GGACAGACCGTAACCACCCTCTGAGTCTGACCCTAGAACACTGGGAGACGTCCAGCGCATCGCGTCCAACAGTCCGT  
650 660 670 680 690 700 710 720

JY\_MuLV GGACAGACCGTAACCACCCTCTGAGTCTGACCCTAGAACACTGGGAGACGTCCAGCGCATCGCGTCCAACAGTCCGT 720  
N417\_MuLV HQ246218 GGACAGACCGTAACCACCCTCTGAGTCTGACCCTAGAACACTGGGAGACGTCCAGCGCATCGCGTCCAACAGTCCGT 720  
DG75\_MuLV AF221065 GGACAGACCGTAACCACCTCTGAGTCTGACCCTAGAACACTGGGAGACGTCCAGCGCATCGCGTCCAACAGTCCGT 709  
VP62\_XMRV DQ399707 GGACAGACCGTAACCTACCCTCTGAGTCTAACCTGAGCACTGGGAGATGTCCAGCGCATGCACTCCAACAGTCTGT 695  
MCF1233\_MuLV U13766 GGACAGACCGTAACCACCCTCTGAGTCTGACCCTAGAACACTGGGAGACGTCCAGCGCATCGCGTCCAACAGTCCGT 719

Majority GGACGTCAAGAAGAGACGCTGGGTACCTTCTGCTCTGCCGAGTGGCCAACCTTTCGGTGTAGGGTGGCCGCAAGATGGTA  
730 740 750 760 770 780 790 800

JY\_MuLV GGACGTCAAGAAGAGACGCTGGGTACCTTCTGCTCTGCCGAGTGGCCAACCTTTCGGTGTAGGGTGGCCGCAAGATGGTA 800  
N417\_MuLV HQ246218 GGACGTCAAGAAGAGACGCTGGGTACCTTCTGCTCTGCCGAGTGGCCAACCTTTCGGTGTAGGGTGGCCGCAAGATGGTA 800  
DG75\_MuLV AF221065 GGACGTCAAGAAGAGACGCTGGGTACCTTCTGCTCTGCCGAGTGGCCAACCTTTCGGTGTAGGGTGGCCGCAAGATGGTA 789  
VP62\_XMRV DQ399707 GGAAGTCAAGAAGAGACGCTGGGTACCTTCTGCTCTGCCGAGTGGCCAACCTTTCGGTGTAGGGTGGCCGCAAGATGGTA 775  
MCF1233\_MuLV U13766 GGACGTCAAGAAGAGACGCTGGGTACCTTCTGCTCTGCCGAGTGGCCAACCTTTCGGTGTAGGGTGGCCGCAAGATGGTA 799

Majority CTTTTAATTTGGACATTATTTTACAGTTAAATCTAAGGTGTTCTCTCCCGTCCCACGGACACCCGGATCAGTCCCA  
810 820 830 840 850 860 870 880

JY\_MuLV CTTTTAATTTGGACATTATTTTACAGTTAAATCTAAGGTGTTCTCTCCCGTCCCACGGACACCCGGATCAGTCCCA 880  
N417\_MuLV HQ246218 CTTTTAATTTGGACATTATTTTACAGTTAAATCTAAGGTGTTCTCTCCCGTCCCACGGACACCCGGATCAGTCCCA 880  
DG75\_MuLV AF221065 CTTTTAATTTGGACATTATTTTACAGTTAAATCTAAGGTGTTCTCTCCCGTCCCACGGACACCCGGATCAGTCCCA 869  
VP62\_XMRV DQ399707 CTTTTAATTTAGTGTATTATCTCTCAGTTCAAGTCTAGAGTGTGTTCTCTCCCGTCCCACGGACACCCGGATCAGTCCCA 855  
MCF1233\_MuLV U13766 CTTTTAATTTGGACATTATTTTACAGTTAAATCTAAGGTGTTCTCTCCCGTCCCACGGACACCCGGATCAGTCCCA 879

Majority TACATTGTCACCTGGGAGGCTATTGCCTATGAACCCCTCCGTGGGTCAAACCTTTTGTCTCTCCAAACTCTCCCCTC  
890 900 910 920 930 940 950 960

JY\_MuLV TACATTGTCACCTGGGAGGCTATTGCCTATGAACCCCTCCGTGGGTCAAACCTTTTGTCTCTCCAAACTCTCCCCTC 960  
N417\_MuLV HQ246218 TACATTGTCACCTGGGAGGCTATTGCCTATGAACCCCTCCGTGGGTCAAACCTTTTGTCTCTCCAAACTCTCCCCTC 960  
DG75\_MuLV AF221065 TACATTGTCACCTGGGAGGCTATTGCCTATGAACCCCTCCGTGGGTCAAACCTTTTGTCTCTCCAAACCCCTCTCTT 949  
VP62\_XMRV DQ399707 TATATGTCACCTGGGAGGCTATTGCCTATGAACCCCTCCGTGGGTCAAACCTTTTGTCTCTCCAAACCCCTCTCTT 935  
MCF1233\_MuLV U13766 TACATTGTCACCTGGGAGGCTATTGCCTATGAACCCCTCCGTGGGTCAAACCTTTTGTCTCTCCAAACTCTCCCCTC 959

Majority TCCAACCGTCCCATCCTCCCATCCGGTCTTCGACCAACCTCCGCCCGATCTGCCCTTACCTGCTTTACCCCT  
970 980 990 1000 1010 1020 1030 1040

JY\_MuLV TCCAACCGTCCCATCCTCCCATCCGGTCTTCGACCAACCTCCGCCCGATCTGCCCTTACCTGCTTTACCCCT 1040  
N417\_MuLV HQ246218 TCCAACCGTCCCATCCTCCCATCCGGTCTTCGACCAACCTCCGCCCGATCTGCCCTTACCTGCTTTACCCCT 1040  
DG75\_MuLV AF221065 ACCGACAGCTCCCGTCTCCCGCCGGTCTTCGACCAACCTCCGCCCGATCTGCCCTTACCTGCTTTACCCCT 1029  
VP62\_XMRV DQ399707 ACCGACAGCTCCCGTCTCCCGCCGGTCTTCGACCAACCTCCGCCCGATCTGCCCTTACCTGCTTTACCCCT 1015  
MCF1233\_MuLV U13766 TCCAACCGTCCCATCCTCCCATCCGGTCTTCGACCAACCTCCGCCCGATCTGCCCTTACCTGCTTTACCCCT 1039

Majority CTATAAAACCCAGACCTTCTAACCTCAGTTTCTCCGATAATGGCGGACCTCTCATTGACCTTCTACAGAAGACCCT  
1050 1060 1070 1080 1090 1100 1110 1120

JY\_MuLV CTATAAAACCCAGACCTTCTAACCTCAGTTTCTCCGATAATGGCGGACCTCTCATTGACCTTCTACAGAAGACCCT 1120  
N417\_MuLV HQ246218 CTATAAAACCCAGACCTTCTAACCTCAGTTTCTCCGATAATGGCGGACCTCTCATTGACCTTCTACAGAAGACCCT 1120  
DG75\_MuLV AF221065 CTATAAAACCCAGACCTTCTAACCTCAGTTTCTCCGATAATGGCGGACCTCTCATTGACCTTCTACAGAAGACCCT 1109  
VP62\_XMRV DQ399707 CTATAAAACCCAGACCTTCTAACCTCAGTTTCTCCGATAATGGCGGACCTCTCATTGACCTTCTACAGAAGACCCT 1095  
MCF1233\_MuLV U13766 CTATAAAACCCAGACCTTCTAACCTCAGTTTCTCCGATAATGGCGGACCTCTCATTGACCTTCTACAGAAGACCCT 1119

Majority CCGCCGTACGGAGAACAGGGACCGTCTCCTCTGACGGAGAXGGCGACAGAGAAGAGGCCACCTCCACTTCTGAGATTCC  
1130 1140 1150 1160 1170 1180 1190 1200

JY\_MuLV CCGCCGTACGGAGAACAGGGACCGTCTCCTCTGACGGAGATGGCGACAGAGAAGAGGCCACCTCCACTTCTGAGATTCC 1200  
N417\_MuLV HQ246218 CCGCCGTACGGAGAACAGGGACCGTCTCCTCTGACGGAGATGGCGACAGAGAAGAGGCCACCTCCACTTCTGAGATTCC 1200  
DG75\_MuLV AF221065 CCGCCGTACGGAGACACACACCTTCTCCTCTGACGGAGATGGCGACAGAGAAGAGGCCACCTCCACTTCTGAGATTCC 1186  
VP62\_XMRV DQ399707 CCGCCGTACGGAGACACACACCTTCTCCTCTGACGGAGATGGCGACAGAGAAGAGGCCACCTCCACTTCTGAGATTCC 1172  
MCF1233\_MuLV U13766 CCGCCGTACGGAGAACAGGGACCGTCTCCTCTGACGGAGATGGCGACAGAGAAGAGGCCACCTCCACTTCTGAGATTCC 1199

Majority TGCCCCCTCTCCCATGGTGTCTCGCTGCGGGGCAAAAAGAGACCCCCCGGGCAGATTCCACCACCTCTCGGGCTTTCC  
1210 1220 1230 1240 1250 1260 1270 1280

JY\_MuLV TGCCCCCTCTCCCATGGTGTCTCGCTGCGGGGCAAAAAGAGACCCCCCGGGCAGATTCCACCACCTCTCGGGCTTTCC 1280  
N417\_MuLV HQ246218 TGCCCCCTCTCCCATGGTGTCTCGCTGCGGGGCAAAAAGAGACCCCCCGGGCAGATTCCACCACCTCTCGGGCTTTCC 1280  
DG75\_MuLV AF221065 CCCCCCTCTCCCATGGTGTCTCGCTGCGGGGCAAAAAGAGACCCCCCGGGCAGATTCCACCACCTCTCGGGCTTTCC 1266  
VP62\_XMRV DQ399707 CCCCCCTCTCCCATGGTGTCTCGCTGCGGGGCAAAAAGAGACCCCCCGGGCAGATTCCACCACCTCTCGGGCTTTCC 1252  
MCF1233\_MuLV U13766 TGCCCCCTCTCCCATGGTGTCTCGCTGCGGGGCAAAAAGAGACCCCCCGGGCAGATTCCACCACCTCTCGGGCTTTCC 1279

Majority CACTCCGTTTGGGGGTAATGGTCAGTTXCAGTACTGGCCGTTTTCTCCTCGGATCTATATAACTGGAAAAATAATAAC  
1290 1300 1310 1320 1330 1340 1350 1360

JY\_MuLV CACTCCGTTTGGGGGTAATGGTCAGTTXCAGTACTGGCCGTTTTCTCCTCGGATCTATATAACTGGAAAAATAATAAC 1360  
N417\_MuLV HQ246218 CACTCCGTTTGGGGGTAATGGTCAGTTXCAGTACTGGCCGTTTTCTCCTCGGATCTATATAACTGGAAAAATAATAAC 1360  
DG75\_MuLV AF221065 CACTCCGATGGGGGAGATGGCAGTTXCAGTACTGGCCGTTTTCTCCTCGGATCTATATAACTGGAAAAATAATAAC 1346  
VP62\_XMRV DQ399707 CACTCCGATGGGGGAGATGGCAGTTXCAGTACTGGCCGTTTTCTCCTCGGATCTATATAACTGGAAAAATAATAAC 1332  
MCF1233\_MuLV U13766 CACTCCGTTTGGGGGTAATGGTCAGTTXCAGTACTGGCCGTTTTCTCCTCGGATCTATATAACTGGAAAAATAATAAC 1359

Majority CCTTCCTTTCTGAAGATCCAGGTAATGACXGCCTTAATTGAGTCTGTCCTCACCACCACCAGCCACCTGGGACGA  
1370 1380 1390 1400 1410 1420 1430 1440

JY\_MuLV CCTTCCTTTCTGAAGATCCAGGTAATGACXGCCTTAATTGAGTCTGTCCTCACCACCACCAGCCACCTGGGACGA 1440  
N417\_MuLV HQ246218 CCTTCCTTTCTGAAGATCCAGGTAATGACXGCCTTAATTGAGTCTGTCCTCACCACCACCAGCCACCTGGGACGA 1440  
DG75\_MuLV AF221065 CCTTCCTTTCTGAAGATCCAGGTAATGACXGCCTTAATTGAGTCTGTCCTCACCACCACCAGCCACCTGGGACGA 1426  
VP62\_XMRV DQ399707 CCTTCCTTTCTGAAGATCCAGGTAATGACXGCCTTAATTGAGTCTGTCCTCACCACCACCAGCCACCTGGGACGA 1412  
MCF1233\_MuLV U13766 CCTTCCTTTCTGAAGATCCAGGTAATGACXGCCTTAATTGAGTCTGTCCTCACCACCACCAGCCACCTGGGACGA 1439

Majority CTGTCAGCAGTTGTTGGGGACTCTGCTGACAGGAGAAGAAAAGCAGCGGGTGTCTCTAGAGGCCAGAAAGGCAGTCCGGG  
1450 1460 1470 1480 1490 1500 1510 1520

JY\_MuLV CTGTCAA CAGTTG CTGGGGACTCTGCTGACAGGAGAAGAAAAGCAGCGGGTGTCTCT GAAGCCAGAAAGGCAGTCCGGG 1520  
N417\_MuLV HQ246218 CTGTCAA CAGTTG CTGGGGACTCTGCTGACAGGAGAAGAAAAGCAGCGGGTGTCTCT GAAGCCAGAAAGGCAGTCCGGG 1520  
DG75\_MuLV AF221065 CTGTCAGCAGTTGTTGGGGACTCTGCTGACAGGAGAAGAAAAGCAGCGGGTGTCTCTAGAGGCC AGAAAGGCAGTCCGGG 1506  
VP62\_XMRV DQ399707 CTGTCAGCAGTTGTTGGGGACTCTGCTGACAGGAGAAGAAAAGCAGCGGGTGTCTCTAGAGGCC AGAAAGGCAGTCCGGG 1492  
MCF1233\_MuLV U13766 CTGTCAGCAA TTGTTGGGGACTCTGCTGACAGGAGAAGAAAAGCAGCGGGTGTCTCTAGAGGCCAGAAAGGCAGTCCGGG 1519

Majority GCAACGATGGACGCCCCACCCAGTTGCCTAATGAAGTCAATGCTGCCTTTCCCCTGAACGTCCCGATTGGGATTACACC  
1530 1540 1550 1560 1570 1580 1590 1600

JY\_MuLV GCGACGATGG CCGCCCCACCCA ATTGCCAATGAGATCGAGGCTGCCTTTCCCCT GAACGTCCCGA CTGGGATTACACC 1600  
N417\_MuLV HQ246218 GCGACGATGG CCGCCCCACCCA ATTGCCAATGAGATCGAGGCTGCCTTTCCCCT GAACGTCCCGA CTGGGATTACACC 1600  
DG75\_MuLV AF221065 GCAA T GATGGACGCCCCACT CAGTTGCCTAATGAAGTCAATGCTGC TTTCCCCTGAACG CCGCCGATTGGGATTACACC 1586  
VP62\_XMRV DQ399707 GCAA T GATGGACGCCCCACT CAGTTGCCTAATGAAGTCAATGCTGC TTTCCCCTGA CCGCCCGATTGGGATTACACC 1572  
MCF1233\_MuLV U13766 GCAACGATGGACGCCCCACCCAGTTGCCTAATGAAGTCAAT TCGCCTT CCCCTTGAACGTCCCGATTGGGATTACA 1599

Majority ACCCCTGAAGGTAGGAACCACCTAGTTCTCTATCGCCAGTTGCTCTTAGCGGGTCTCCAAAACGCGGGCAGGAGCCCCAC  
1610 1620 1630 1640 1650 1660 1670 1680

JY\_MuLV ACCCTTAGAGGTAGGAACCACCTAGTTCTCTATCGCAAGCTGCTCTT GCGGGTCTCCAAAAT GCGGGCAGGAGCCCCAC 1680  
N417\_MuLV HQ246218 ACCCTTAGAGGTAGGAACCACCTAGTTCTCTATCGCCAGTTGCTCTT GCGGGTCTCCAAAAT GCGGGCAGGAGCCCCAC 1680  
DG75\_MuLV AF221065 ACTACAGAAGGTAGGAACCACCTAGTCTCTATCGCCAGTTGCTCTTAGCGGGTCTCCAAAACGCGGGCAGGAGCCCCAC 1666  
VP62\_XMRV DQ399707 ACTACAGAAGGTAGGAACCACCTAGTCTCTA CCGCCAGTTGCTCTTAGCGGGTCTCCAAAACGCGGGCAGGAGCCCCAC 1652  
MCF1233\_MuLV U13766 ACCCCTGAAGGTAGGAACCACCTAGTTCTCTATCGCCAGTTGCTCTTAGCGGGTCTCCAAAACGCGGGC GAGAGCCCCAC 1679

Majority CAATTTGGCCAAGGTAAGGAATAAACCAGGGACCTAATGAGTCTCCCTCAGCCTTTTATAGAGAGACTCAAGGAGGCCT  
1690 1700 1710 1720 1730 1740 1750 1760

JY\_MuLV CAATTTGGC TAAGGTAAGGAATAAACCAGGGGTCAA CAGATCCCTCGCCTTTCTAGAGAGACTCAAAGAGGCCT 1760  
N417\_MuLV HQ246218 CAATTTGGC TAAGGTAAGGAATAAACCAGGGGTCAA CAGATCCCTCGCCTTTCTAGAGAGACTCAAAGAGGCCT 1760  
DG75\_MuLV AF221065 CAATTTGGCCAAGGTAAGGAATAAACCAGGGACCTAATGAGTCTCCCTCAGCCTTTTATAGAGAGACTCAAGGAGGCCT 1746  
VP62\_XMRV DQ399707 CAATTTGGCCAAGGTAAGGAATAAACCAGGGACCTAATGAGTCTCCCTCAGCCTTTTATAGAGAGACTCAAGGAGGCCT 1732  
MCF1233\_MuLV U13766 CAATTTGGCCAAGGTAAGGAATAAACCAGGGACCTAATGAGTCTCCCTCAGCCTTTTAGAGAGACTCAAGGAAGGCCT 1759

Majority ATCGCAGATACACTCCTTATGACCCTGAGGACCCTGGGCAAGAAACCAATGTATCCATGTCATTTCATCTGGCAGTCTGCT  
1770 1780 1790 1800 1810 1820 1830 1840

JY\_MuLV ATCGCAGATACACTCCTTATGACCCTGAGGACCCTGGGCAAGAAACCAATGTATCCATGTC TTTCATCTGGCAGTCTGCT 1840  
N417\_MuLV HQ246218 ATCGCAGATACACTCCTTATGACCCTGAGGACCCTGGGCAAGAAACCAATGTATCCATGTC TTTCATCTGGCAGTCTGCT 1840  
DG75\_MuLV AF221065 ATCGCAG TACACTCCTTATGACCCTGAGGACCCTGGGCAAGAAACCAATGT TTTTCATCTGGCAGTCTGCT 1826  
VP62\_XMRV DQ399707 ATCGCAG TACACTCCTTATGACCCTGAGGACCCTGGGCAAGAAACCAATGT TTTTCATGTCATTTCATCTGGCAGTCTGCT 1812  
MCF1233\_MuLV U13766 ATCGCAGATACACTCCTTATGAC TCTGAGGACCCTGGGCAAGAAACCAATGTAT TTTTCATGTCATTTCATCTGGCAGTCTGCT 1839

Majority CCAGACATTGGTCGAAAGTTAGAGCGGTTAGAAGACTTAAAAATAAGACCTTAGGAGACTTAGTGAGAGAAGCXGAAAG  
1850 1860 1870 1880 1890 1900 1910 1920

JY\_MuLV CCAGACATTGGTCGAAAGTTAGAGCGGTTAGAAGACTTAAAAATAAGACCTTAGGAGACTTAGTGAGAGAAGCAGAAAG 1920  
N417\_MuLV HQ246218 CCAGACATTGGTCGAAAGTTAGAGCGGTTAGAAGACTTAAAAATAAGACCTTAGGAGACTTAGTGAGAGAAGCAGAAAG 1920  
DG75\_MuLV AF221065 CCGGATATCGGGCGAAAGTTAGAGCGGTTAGAAGACTTAAAAATAAGACCTTAGGAGACTTAGTGAGAGGAAGCAGAAA 1906  
VP62\_XMRV DQ399707 CCGGATATCGGGCGAAAGTTAGAGCGGTTAGAAGACTTAAAAATAAGACCTTAGGAGACTTAGTGAGAGGAAGCAGAAA 1892  
MCF1233\_MuLV U13766 CCAGACATTGGTCGAAAGTTAGAGCGGTTAGAAGACTTAAAAATAAGACCTTAGGAGACTTAGTGAGAGAAGCAGAAAG 1919

Majority GATCTTTAATAAGXGAGAAACCCCAGAAGAGAGAGAAGAACGTATTAGGAGAGAAACAGAGGAAAAAAGAGCGCCGTA  
1930 1940 1950 1960 1970 1980 1990 2000

JY\_MuLV GATCTTTAATAAGAGAGACCCCAGAAGAGAGAGAAGAACGTATTAAGAGAGAAACAGAGGAAAAAAGAGCGCCGTA 2000  
N417\_MuLV HQ246218 GATCTTTAATAAGAGAGACCCCAGAAGAGAGAGAAGAACGTATTAAGAGAGAAACAGAGGAAAAAAGAGCGCCGTA 2000  
DG75\_MuLV AF221065 GATCTTTAATAAGAGAGAAACCCCAGAAAGAGAGAGAACGTATTAGGAGAGAAACAGAGGAAAAAAGAGAACGCGGTA 1986  
VP62\_XMRV DQ399707 GATCTTTAATAAGAGAGAAACCCCAGAAAGAGAGAGAACGTATTAGGAGAGAAATAGAGGAAAAAAGAGAACGCGGTA 1972  
MCF1233\_MuLV U13766 GATCTTTAATAAGAGAGAAACTCCAGAGAGAGAGAAGAGCGCTTAGGAGGAGAGACAGAGGAAAAAGAGAGCGCGTA 1999

Majority GGGCAGAGGATGAGCAGAAAGAGAAAGAGAGGGACCGCAGAAGACATAGAGAAATGAGCAAACCTCTTGCCACCGTAGTT  
2010 2020 2030 2040 2050 2060 2070 2080

JY\_MuLV GGGCAGAGGATGAGCAGAAAGAGAAAGAGAGGGACCGCAGAAGACATAGAGAAATGAGCAAACCTCTTGCCACCGTAGTT 2080  
N417\_MuLV HQ246218 GGGCAGAGGATGAGCAGAAAGAGAAAGAGAGGGACCGCAGAAGACATAGAGAAATGAGCAAACCTCTTGCCACCGTAGTT 2080  
DG75\_MuLV AF221065 GGGCAGAGGATGAGCAGAGAGAGAAAGAAAGGGACCGCAGAGACATAGAGAGATGAGCAAGCTCTTGCCACCGTAGTT 2066  
VP62\_XMRV DQ399707 GGGCAGAGGATGAGCAGAGAGAGAGAAAGGGACCGCAGAAGACATAGAGAGATGAGCAAGCTCTTGCCACCGTAGTT 2052  
MCF1233\_MuLV U13766 GGGCAGAGAGAGAGCAGAAAGAGAAAGAGAGGGACCGTAGGAGACATAGAGAAATGAGCAAACCTCTTGCCACCGTAGTT 2079

Majority AXTGGTCAGAGACAGGATAGACAGGGGGGAGAGCGAAGGAGGCCCAACTTGATAAGGACCAATGCGCCTACTGCAAAGA  
2090 2100 2110 2120 2130 2140 2150 2160

JY\_MuLV ACAGGTCAGAGACAGGATAGACAGGGGGGAGAGCGAAGGAGGCCCAACTTGATAAGGACCAATGCGCCTACTGCAAAGA 2160  
N417\_MuLV HQ246218 ACAGGTCAGAGACAGGATAGACAGGGGGGAGAGCGAAGGAGGCCCAACTTGATAAGGACCAATGCGCCTACTGCAAAGA 2160  
DG75\_MuLV AF221065 AGTGGACAGAGACAGGATAGACAGGGGGGAGAGCGAAGGAGGCCCAACTTGATAAGGACCAATGCGCCTACTGCAAAGA 2146  
VP62\_XMRV DQ399707 ATTGGTCAGAGACAGGATAGACAGGGGGGAGAGCGAGGAGGCCCAACTTGATAAGGACCAATGCGCCTACTGCAAAGA 2132  
MCF1233\_MuLV U13766 AGTGGACAGAGACAGGATAGACAGGGGGGAGAGCGAAGGAGGCCCAACTTGATAAGGACCAATGCGCCTACTGCAAAGA 2159

Majority AAAGGGACACTGGGCTAAGGACTGCCCAAAGAAGCCACGGGGGCCCCGAGGACCGAGGCCCCAGACCTCCCTCCTGACCT  
2170 2180 2190 2200 2210 2220 2230 2240

JY\_MuLV AAAGGGACACTGGGCTAAGGACTGCCCAAAGAAGCCACGGGGGCCCCGAGGACCGAGGCCCCAGACCTCCCTCCTGACCT 2240  
N417\_MuLV HQ246218 AAAGGGACACTGGGCTAAGGACTGCCCAAAGAAGCCACGGGGGCCCCGAGGACCGAGGCCCCAGACCTCCCTCCTGACCT 2240  
DG75\_MuLV AF221065 AAAGGGACACTGGGCTAAGGACTGCCCAAAGAAGCCACGAGGGGCCCGGAGGACCGAGGCCCCAGACCTCCCTCCTGACCT 2226  
VP62\_XMRV DQ399707 AAAGGGACACTGGGCTAAGGACTGCCCAAAGAAGCCACGAGGGGCCCGGAGGACCGAGGCCCCAGACCTCCCTCCTGACCT 2212  
MCF1233\_MuLV U13766 AAAGGGACACTGGGCTAAGGACTGCCCAAAGAAGCCACGGGGGCCCCGAGGACCGAGGCCCCAGACCTCCCTCCTGACCT 2239

Majority TAGATGACTAGGGAGG-TCAGGGTCAGGAGCCCCCCCCTGAACCCAGGATAACCCTCACTGTGCGGGGGCAACCCGTAC  
2250 2260 2270 2280 2290 2300 2310 2320

JY\_MuLV TAGATGACTAGGGAGG-TCAGGGTCAGGAGCCCCCCCCTGAACCCAGGATAACCCTCACTGTGCGGGGGCAACCCGTAC 2319  
N417\_MuLV HQ246218 TAGATGACTAGGGAGG-TCAGGGTCAGGAGCCCCCCCCTGAACCCAGGATAACCCTCACTGTGCGGGGGCAACCCGTAC 2319  
DG75\_MuLV AF221065 TAGGTGACTAGGGAGG-TCAGGGTCAGGAGCCCCCCCCTGAACCCAGGATAACCCTCAAGTGTGCGGGGGCAACCCGTAC 2305  
VP62\_XMRV DQ399707 TAGGTGACTAGGGAGG-TCAGGGTCAGGAGCCCCCCCCTGAACCCAGGATAACCCTCAAGTGTGCGGGGGCAACCCGTAC 2291  
MCF1233\_MuLV U13766 TAGAGTACTAGGGAGG-TCAGGGTCAGGAGCCCCCCCCTGAACCCAGGATAACCCTCACTGTGCGGGGGCAACCCGTAC 2319

Majority CTTCTGGTGGATACTGGGGCCCAACTCCGTGCTGACCCAAAATCCTGGACCCCTAAGTGACAGGTCTGCCTGGGTCC  
2330 2340 2350 2360 2370 2380 2390 2400

JY\_MuLV CTTCTGGTGGATACTGGGGCCCAACTCCGTGCTGACCCAAAATCCTGGACCCCTAAGTGACAGGTCTGCCTGGGTCC 2399  
N417\_MuLV HQ246218 CTTCTGGTGGATACTGGGGCCCAACTCCGTGCTGACCCAAAATCCTGGACCCCTAAGTGACAGGTCTGCCTGGGTCC 2399  
DG75\_MuLV AF221065 CTTCTGGTAGATACTGGGGCCCAACTCCGTGCTGACCCAAAATCCTGGACCCCTAAGTGACAGGTCTGCCTGGGTCC 2385  
VP62\_XMRV DQ399707 CTTCTGGTAGATACTGGGGCCCAACTCCGTGCTGACCCAAAATCCTGGACCCCTAAGTGACAGGTCTGCCTGGGTCC 2371  
MCF1233\_MuLV U13766 CTTCTGGTGGATACTGGGGCCCAACTCCGTGCTGACTCAAATCCGGGCCCCCTAAGTGACAGGTCTGGCTGGGTCC 2399

Majority AAGGGGCTACTGGAGGAAAGCGGTATCGCTGGACCACAGATCGCAAGGTGCACCTGGCTACCGGTAAGGTCACCTACTCT  
2410 2420 2430 2440 2450 2460 2470 2480

JY\_MuLV AAGGGGCTACTGGAGGAAAGCGGTATCACTGGACCACAGATCGCAAGGTGCACCTGGCTACCGGTAAGGTCACCTACTCT 2479  
N417\_MuLV HQ246218 AAGGGGCTACTGGAGGAAAGCGGTATCACTGGACCACAGATCGCAAGGTGCACCTGGCTACCGGTAAGGTCACCTACTCT 2479  
DG75\_MuLV AF221065 AAGGGGCTACTGGAGGAAAGCGGTATCGCTGGACCACGATCGCAAAGTACACCTAGCTACCGGTAAGGTCACCTACTCT 2465  
VP62\_XMRV DQ399707 AAGGGGCTACTGGAGGAAAGCGGTATCGCTGGACCACGATCGCAAAGTACACTCTGGCTACCGGTAAGGTCACCTACTCT 2451  
MCF1233\_MuLV U13766 AAGGGGCTACTGGAGGAAAGCGGTATCGCTGGACCACAGATCGCAAGGTGCACCTAGCTACCGGTAAGGTCACCTACTCT 2479

Majority TTCCTCCATGTGCCAGACTGCCCTTATCCTTTGCTAGGAAGAGACTTGTGACTAACTAAAAGCCAGATCCACTTCGA  
2490 2500 2510 2520 2530 2540 2550 2560

JY\_MuLV TTCCTCCATGTGCCAGACTGCCCTTATCCTTTGCTAGGAAGGACTTGTGACTAAAGTAAAGGCCAGATCCACTTCGA 2559  
N417\_MuLV HQ246218 TTCCTCCATGTGCCAGACTGCCCTTATCCTTTGCTAGGAAGGACTTGTGACTAAAGTAAAGGCCAGATCCACTTCGA 2559  
DG75\_MuLV AF221065 TTCCTCCATGTGCCAGACTGCCCTTATCCTTTGCTAGGAAGAGACTTGTGACTAACTAAAAGCCAGATCCACTTCGA 2545  
VP62\_XMRV DQ399707 TTCCTCCATGTGCCAGACTGCCCTTATCCTTTGCTAGGAAGAGACTTGTGACTAACTAAAAGCCAGATCCACTTCGA 2531  
MCF1233\_MuLV U13766 TTCCTCCATGTGCCAGACTGCCCTTATCCTTTGCTAGGAAGAGACTTGTGACTAACTAAAAGCCAGATCCACTTCGA 2559

Majority GGGATCGGGAGCTCAGTTGTGGGACCAAAGGACAGCCCCTGCAGGTGTTGACCCTTGGCATAGAGGATGAGTATCGGC  
2570 2580 2590 2600 2610 2620 2630 2640

JY\_MuLV GGGATCGGGAGCTCAGTTGTGGGACCAAAGGACAGCCCCTGCAGGTGTTGACCCTTGGCATAGAGGATGAGTATCGGC 2639  
N417\_MuLV HQ246218 GGGATCGGGAGCTCAGTTGTGGGACCAAAGGACAGCCCCTGCAGGTGTTGACCCTTGGCATAGAGGATGAGTATCGGC 2639  
DG75\_MuLV AF221065 GGGATCAGGAGCTCAGTTGTAGGACCAATGGGACAGCCCCTGCAAGTGTGACCCATAATATAGAGGATGAGTATCGGC 2625  
VP62\_XMRV DQ399707 GGGATCAGGAGCTCAGTTGTGGGACCAATGGGACAGCCCCTGCAAGTGTGACCCAGTAAATCATAGAGATGAGTATCGGC 2611  
MCF1233\_MuLV U13766 GGGATCGGGAGCTCAGTTGTGGGACCAAAGGACAGCCCCTGCAGGTGTTGACCCTTGGCATAGAGGATGAGTATCGGC 2639

Majority TACATGAGACCTCAACAGAGCCGGATGTTTCTCTAGGGTCCACCTGGCTTTCTGACTTTCCCAGGCCTGGGCAGAAACC  
2650 2660 2670 2680 2690 2700 2710 2720

JY\_MuLV TACATGAGACCTCAACAGAGCCGGATGTTTCTCTAGGGTCCACCTGGCTTTCTGACTTTCCCAGGCCTGGGCAGAAACC 2719  
N417\_MuLV HQ246218 TACATGAGACCTCAACAGAGCCGGATGTTTCTCTAGGGTCCACCTGGCTTTCTGACTTTCCCAGGCCTGGGCAGAAACC 2719  
DG75\_MuLV AF221065 TACATGAGACCTCAACAGAGCCGGATGTTTCTCTAGGGTCCACCTGGCTTTCTGACTTTCCCAGGCCTGGGCAGAAACC 2705  
VP62\_XMRV DQ399707 TACATGATACAGGAAAGAGCCAGATGTTTCTCTAGGGTCCACCTGGCTTTCTGACTTTCCCAGGCCTGGGCAGAAACC 2691  
MCF1233\_MuLV U13766 TACATGAGACCTCAACAGAGCCGGATGTTTCTCTAGGGTCCACCTGGCTTTCTGACTTTCCCAGGCCTGGGCAGAAACC 2719

Majority GGGGGCATGGGACTGGCAGTTCGCCAAGCGCCTCTGATTATACCTCTAAGGCAACCTCCACCCCTGTGTCCATCAAACA  
2730 2740 2750 2760 2770 2780 2790 2800

JY\_MuLV GGGGGCATGGGACTGGCAGTTCGCCAAGCGCCTCTGATTATACCTCTAAGGCAACCTCCACCCCTGTGTCCATCAAACA 2799  
N417\_MuLV HQ246218 GGGGGCATGGGACTGGCAGTTCGCCAAGCGCCTCTGATTATACCTCTAAGGCAACCTCCACCCCTGTGTCCATCAAACA 2799  
DG75\_MuLV AF221065 GGGGCATGGGACTGGCAGTTCGCCAAGCGCCTCTGATTATACCTCTAAGGCAACCTCCACCCCTGTGTCCATCAAACA 2785  
VP62\_XMRV DQ399707 GGGGGCATGGGACTGGCAGTTCGCCAAGCGCCTCTGATTATACCTCTAAGGCAACCTCCACCCCTGTGTCCATCAAACA 2771  
MCF1233\_MuLV U13766 GGGGGCATGGGACTGGCAGTTCGCCAAGCGCCTCTGATTATACCTCTAAGGCAACCTCCACCCCTGTGTCCATCAAACA 2799

Majority GTACCCCATGTCACACGAAGCCAGACTGGGGATCAAGCCCCACATACAGAGACTGTTGGACCAGGGAATATTGGTACCTT  
2810 2820 2830 2840 2850 2860 2870 2880

JY\_MuLV GTACCCCATGTCACACGAAGCCAGACTGGGGATCAAGCCCCACATACAGAGACTGTTGGACCAGGGAATATTGGTACCTT 2879  
N417\_MuLV HQ246218 GTACCCCATGTCACACGAAGCCAGACTGGGGATCAAGCCCCACATACAGAGACTGTTGGACCAGGGAATATTGGTACCTT 2879  
DG75\_MuLV AF221065 ATACCCCATGTCACAGGAAGCCAGACTGGGGATCAAGCCCCACATACAGAGACTGTTGGACCAGGGAATATTGGTACCTT 2865  
VP62\_XMRV DQ399707 ATACCCCATGTCACAGGAAGCCAGACTGGGGATCAAGCCCCACATACAGAGACTGTTGGACCAGGGAATATTGGTACCTT 2851  
MCF1233\_MuLV U13766 GTACCCCATGTCACACGAAGCCAGACTGGGGATCAAGCCCCACATACAGAGACTGTTGGACCAGGGAATATTGGTACCTT 2879

Majority GCCAGTCCCCTGGAACACACCCCTGCTGCCCGTTAAGAAACCAGGGACTAATGATTACAGGCCTGTCCAGGATCTGAGA  
2890 2900 2910 2920 2930 2940 2950 2960

JY\_MuLV GCCAGTCCCCTGGAACACACCCCTGCTGCCCGTTAAGAAACCAGGGACTAATGATTACAGGCCTGTCCAGGATCTGAGA 2959  
N417\_MuLV HQ246218 GCCAGTCCCCTGGAACACACCCCTGCTGCCCGTTAAGAAACCAGGGACTAATGATTACAGGCCTGTCCAGGATCTGAGA 2959  
DG75\_MuLV AF221065 GCCAGTCCCCTGGAACACACCCCTGCTGCCCGTTAAGAAACCAGGGACTAATGATTACAGGCCTGTCCAGGATCTGAGA 2945  
VP62\_XMRV DQ399707 GCCAGTCCCCTGGAACACACCCCTGCTGCCCGTTAAGAAACCAGGGACTAATGATTACAGGCCTGTCCAGGATCTGAGA 2931  
MCF1233\_MuLV U13766 GCCAGTCCCCTGGAACACACCCCTGCTGCCCGTTAAGAAACCAGGGACTAATGATTACAGGCCTGTCCAGGATCTGAGA 2959

Majority GAAGTCAACAAGCGGGTGAAGATATCCACCCACCCTGCCCCAATCCTTACAACCTCTTAAGTGGACTCCCTCCGTCCA  
2970 2980 2990 3000 3010 3020 3030 3040

JY\_MuLV GAAGTCAACAAGCGGGTGAAGATATCCACCCACCCTGCCCCAATCCTTACAACCTCTTAAGTGGACTCCCTCCGTCCA 3039  
N417\_MuLV HQ246218 GAAGTCAACAAGCGGGTGAAGATATCCACCCACCCTGCCCCAATCCTTACAACCTCTTAAGTGGACTCCCTCCGTCCA 3039  
DG75\_MuLV AF221065 GAAGTCAACAAGCGGGTGAAGATATCCACCCACCCTGCCCCAATCCTTACAACCTCTTAAGTGGACTCCCTCCGTCCA 3025  
VP62\_XMRV DQ399707 GAAGTCAACAAGCGGGTGAAGATATCCACCCACCCTGCCCCAATCCTTACAACCTCTTAAGTGGACTCCCTCCGTCCA 3011  
MCF1233\_MuLV U13766 GAAGTCAACAAGCGGGTGAAGATATCCACCCACCCTGCCCCAATCCTTACAACCTCTTAAGTGGACTCCCTCCGTCCA 3039

Majority CCAGTGGTACACTGTGCTTGATTTAAAAGATGCCTTTTTCTGCCTGAGACTCCACCCACCAGTCAGCCTCTCTTTGCCT  
3050 3060 3070 3080 3090 3100 3110 3120

JY\_MuLV CCAGTGGTACACTGTGCTTGATTTAAAAGATGCCTTTTTCTGCCTGAGACTCCACCCACCAGTCAGCCTCTCTTTGCCT 3119  
N417\_MuLV HQ246218 CCAGTGGTACACTGTGCTTGATTTAAAAGATGCCTTTTTCTGCCTGAGACTCCACCCACCAGTCAGCCTCTCTTTGCCT 3119  
DG75\_MuLV AF221065 CCAGTGGTACACTGTGCTTGATTTAAAAGATGCCTTTTTCTGCCTGAGACTCCACCCACCAGTCAGCCTCTCTTTGCCT 3105  
VP62\_XMRV DQ399707 CCAGTGGTACACTGTGCTTGATTTAAAAGATGCCTTTTTCTGCCTGAGACTCCACCCACCAGTCAGCCTCTCTTTGCCT 3091  
MCF1233\_MuLV U13766 CCAGTGGTACACTGTGCTTGATTTAAAAGATGCCTTTTTCTGCCTGAGACTCCACCCACCAGTCAGCCTCTCTTTGCCT 3119

Majority TTGAGTGGAGAGATCCAGAAATGGGAATCTCTGGACAATTGACCTGGACCAGACTCCACAGGGTTTCAAAAACAGTCCC  
3130 3140 3150 3160 3170 3180 3190 3200

JY\_MuLV TTGAGTGGAGAGATCCAGAAATGGGAATCTCTGGACAATTGACCTGGACCAGACTCCACAGGGTTTCAAAAACAGTCCC 3199  
N417\_MuLV HQ246218 TTGAGTGGAGAGATCCAGAAATGGGAATCTCTGGACAATTGACCTGGACCAGACTCCACAGGGTTTCAAAAACAGTCCC 3199  
DG75\_MuLV AF221065 TTGAGTGGAGAGATCCAGAAATGGGAATCTCTGGACAATTGACCTGGACCAGACTCCACAGGGTTTCAAAAACAGTCCC 3185  
VP62\_XMRV DQ399707 TTGAGTGGAGAGATCCAGAAATGGGAATCTCTGGACAATTGACCTGGACCAGACTCCACAGGGTTTCAAAAACAGTCCC 3171  
MCF1233\_MuLV U13766 TTGAGTGGAGAGATCCAGAAATGGGAATCTCTGGACAATTGACCTGGACCAGACTCCACAGGGTTTCAAAAACAGTCCC 3199

Majority ACCCTGTTTGATGAGGCATTGCACAGAGACCTAGCAGACTTCCGGATCCAGCACCCAGACTTGATCCTGCTACAGTACGT  
3210 3220 3230 3240 3250 3260 3270 3280

JY\_MuLV ACCCTGTTTGATGAGGCATTGCACAGAGACCTAGCAGACTTCCGGATCCAGCACCCAGACTTGATCCTGCTACAGTACGT 3279  
N417\_MuLV HQ246218 ACCCTGTTTGATGAGGCATTGCACAGAGACCTAGCAGACTTCCGGATCCAGCACCCAGACTTGATCCTGCTACAGTACGT 3279  
DG75\_MuLV AF221065 ACCCTGTTTGATGAGGCATTGCACAGAGACCTAGCAGACTTCCGGATCCAGCACCCAGACTTGATCCTGCTACAGTACGT 3265  
VP62\_XMRV DQ399707 ACCCTGTTTGATGAGGCATTGCACAGAGACCTAGCAGACTTCCGGATCCAGCACCCAGACTTGATCCTGCTACAGTACGT 3251  
MCF1233\_MuLV U13766 ACCCTGTTTGATGAGGCATTGCACAGAGACCTAGCAGACTTCCGGATCCAGCACCCAGACTTGATCCTGCTACAGTACGT 3279

Majority GGATGACTTACTGCTGGCCGCTACTTCCGAAGTACTGCCAACAAGGACTCGGGCCCTTCTACAAACCTAGGGGACC  
3290 3300 3310 3320 3330 3340 3350 3360

JY\_MuLV GGATGACTTACTGCTGGCCGCTACTTCCGAAGTACTGCCAACAAGGACTCGGGCCCTTCTACAAACCTAGGGGACC 3359  
N417\_MuLV HQ246218 GGATGACTTACTGCTGGCCGCTACTTCCGAAGTACTGCCAACAAGGACTCGGGCCCTTCTACAAACCTAGGGGACC 3359  
DG75\_MuLV AF221065 GGATGACTTACTGCTGGCCGCTACTTCCGAAGTACTGCCAACAAGGACTCGGGCCCTTCTACAAACCTAGGGGACC 3345  
VP62\_XMRV DQ399707 GGATGACTTACTGCTGGCCGCTACTTCCGAAGTACTGCCAACAAGGACTCGGGCCCTTCTACAAACCTAGGGGACC 3331  
MCF1233\_MuLV U13766 GGATGACTTACTGCTGGCCGCTACTTCCGAAGTACTGCCAACAAGGACTCGGGCCCTTCTACAAACCTAGGGGACC 3359

Majority TCGGATACCGGGCCTCGGCCAAGAAAGCCCAAATCTGCCAGAAACAGGTTAAATACCTGGGGTACCTTCTGAGGGAGGGT  
3370 3380 3390 3400 3410 3420 3430 3440

JY\_MuLV TCGGATACCGGGCCTCGGCCAAGAAAGCCCAAATCTGCCAGAAACAGGTTAAATACCTGGGGTACCTTCTGAGGGAGGGT 3439  
N417\_MuLV HQ246218 TCGGATACCGGGCCTCGGCCAAGAAAGCCCAAATCTGCCAGAAACAGGTTAAATACCTGGGGTACCTTCTGAGGGAGGGT 3439  
DG75\_MuLV AF221065 TCGGGTA CGGGCCTCGGCCAAGAAAGCCCAAATCTGCCAGAAACAGGTTAAATACCTGGGGTACCTTCTGAGGGAGGGT 3425  
VP62\_XMRV DQ399707 TCGGGTA CGGGCCTCGGCCAAGAAAGCCCAAATCTGCCAGAAACAGGTTAAATACCTGGGGTACCTTCTGAGGGAGGGT 3411  
MCF1233\_MuLV U13766 TCGGATACCGGGCCTCGGCCAAGAAAGCCCAAATCTGCCAGAAACAGGTTAAATACCTGGGGTACCTTCTGAGGGAGGGT 3439

Majority CAGAGATGGCTGACTGAGGCTAGAAAAGAGACTGTGATGGGGCAACCCGTTCAAAGACTCCTCGACAATAAGGGAGTT  
3450 3460 3470 3480 3490 3500 3510 3520

JY\_MuLV CAGAGATGGCTGACTGAGGCTAGAAAAGAGACTGTGATGGGGCAACCCGTTCAAAGACTCCTCGACAATAAGGGAGTT 3519  
N417\_MuLV HQ246218 CAGAGATGGCTGACTGAGGCTAGAAAAGAGACTGTGATGGGGCAACCCGTTCAAAGACTCCTCGACAATAAGGGAGTT 3519  
DG75\_MuLV AF221065 CAGAGATGGCTGACTGAGGC CAGAAAAGAGACTGTGATGGGGCAACCCGTTCAAAGACTCCTCGACAATAAGGGAGTT 3505  
VP62\_XMRV DQ399707 CAGAGATGGCTGACTGAGGC CAGAAAAGAGACTGTGATGGGGCAACCCGTTCAAAGACTCCTCGACAATAAGGGAGTT 3491  
MCF1233\_MuLV U13766 CAGAGATGGCTGACTGAGGCTAGAAAAGAGACTGTGATGGGGCAACCCGTTCAAAGACTCCTCGACAATAAGGGAGTT 3519

Majority CCTAGGGACGGCAGGCTTCTGCCGCCTCTGGATCCCTGGGTTTGCAGAAATGGCGGCCCCCTTGTATCCTCTTACCAAAA  
3530 3540 3550 3560 3570 3580 3590 3600

JY\_MuLV CCTAGGGACGGCAGGCTTCTGCCGCCTCTGGATCCCTGGGTTTGCAGAAATGGCGGCCCCCTTGTATCCTCTTACCAAAA 3599  
N417\_MuLV HQ246218 CCTAGGGACGGCAGGCTTCTGCCGCCTCTGGATCCCTGGGTTTGCAGAAATGGCGGCCCCCTTGTATCCTCTTACCAAAA 3599  
DG75\_MuLV AF221065 CCTAGGGACGGCAGGCTTCTGTCGCCTCTGGATCCCTGGGTTTGCAGAAATGGCGGCCCCCTTGTATCCTCTTACCAAAA 3585  
VP62\_XMRV DQ399707 CCTAGGGACGGCAGGCTTCTGTCGCCTCTGGATCCCTGGGTTTGCAGAAATGGCGGCCCCCTTGTATCCTCTTACCAAAA 3571  
MCF1233\_MuLV U13766 CCTAGGGACGGCAGGCTTCTGCCGCCTCTGGATCCCTGGGTTTGCAGAAATGGCGGCCCCCTTGTATCCTCTTACCAAAA 3599

Majority CGGGGACTCTGTTTAATTGGGGCCCAGACCAGCAAAGGCCTATCAAGAAATCAAACAGGCCCTTCTAACTGCCCCGCC  
3610 3620 3630 3640 3650 3660 3670 3680

JY\_MuLV CGGGGACTCTGTTTAATTGGGGCCCAGACCAGCAAAGGCCTATCAAGAAATCAAACAGGCCCTTCTAACTGCCCCGCC 3679  
N417\_MuLV HQ246218 CGGGGACTCTGTTTAATTGGGGCCCAGACCAGCAAAGGCCTATCAAGAAATCAAACAGGCCCTTCTAACTGCCCCGCC 3679  
DG75\_MuLV AF221065 CGGGGACTCTGTTTAATTGGGGCCCAGACCAGCAAAGGCCTATCAAGAAATCAAACAGGCCCTTCTAACTGCCCCGCC 3665  
VP62\_XMRV DQ399707 CGGGGACTCTGTTTAATTGGGGCCCAGACCAGCAAAGGCCTATCAAGAAATCAAACAGGCCCTTCTAACTGCCCCGCC 3651  
MCF1233\_MuLV U13766 CGGGGACTCTGTTTAATTGGGGCCCAGACCAGCAAAGGCCTATCAAGAAATCAAACAGGCCCTTCTAACTGCCCCGCC 3679

Majority CTGGGATTGCCAGATTTGACTAAGCCCTTTGAACTCTTTGTCGACGAGAAGCAGGGCTACGCCAAAGGCGTCTAACGCA  
3690 3700 3710 3720 3730 3740 3750 3760

JY\_MuLV CTGGGATTGCCAGATTTGACTAAGCCCTTTGAACTCTTTGTCGACGAGAAGCAGGGCTACGCCAAAGGCGTCTAACGCA 3759  
N417\_MuLV HQ246218 CTGGGATTGCCAGATTTGACTAAGCCCTTTGAACTCTTTGTCGACGAGAAGCAGGGCTACGCCAAAGGCGTCTAACGCA 3759  
DG75\_MuLV AF221065 CTGGGATTGCCAGATTTGACTAAGCCCTTTGAACTCTTTGTCGACGAGAAGCAGGGCTACGCCAAAGGCGTCTAACGCA 3745  
VP62\_XMRV DQ399707 CTGGGATTGCCAGATTTGACTAAGCCCTTTGAACTCTTTGTCGACGAGAAGCAGGGCTACGCCAAAGGCGTCTAACGCA 3731  
MCF1233\_MuLV U13766 CTGGGATTGCCAGATTTGACTAAGCCCTTTGAACTCTTTGTCGACGAGAAGCAGGGCTACGCCAAAGGCGTCTAACGCA 3756

Majority AAAACTGGGACCTTGGCGTCGGCCTGTGGCCTACCTGTCCAAAAGCTAGACCCAGTGGCAGCTGGGTGGCCCCCTTGCC  
3770 3780 3790 3800 3810 3820 3830 3840

JY\_MuLV AAAACTGGGACCTTGGCGTCGGCCTGTGGCCTACCTGTCCAAAAGCTAGACCCAGTGGCAGCTGGGTGGCCCCCTTGCC 3839  
N417\_MuLV HQ246218 AAAACTGGGACCTTGGCGTCGGCCTGTGGCCTACCTGTCCAAAAGCTAGACCCAGTGGCAGCTGGGTGGCCCCCTTGCC 3839  
DG75\_MuLV AF221065 AAAACTGGGACCTTGGCGTCGGCCTGTGGCCTACCTGTCCAAAAGCTAGACCCAGTGGCAGCTGGGTGGCCCCCTTGCC 3825  
VP62\_XMRV DQ399707 AAAACTGGGACCTTGGCGTCGGCCTGTGGCCTACCTGTCCAAAAGCTAGACCCAGTGGCAGCTGGGTGGCCCCCTTGCC 3811  
MCF1233\_MuLV U13766 AAAACTGGGACCTTGGCGTCGGCCTGTGGCCTACCTGTCCAAAAGCTAGACCCAGTGGCAGCTGGGTGGCCCCCTTGCC 3836



Majority TACGGATGGTAGCAGCCATTGCCGTTCTGACAAAAGATGCAGGCAAGCTAACTATGGGACAGCCGCTAGTCATCCTGGCC  
3850 3860 3870 3880 3890 3900 3910 3920

JY\_MuLV TACGGATGGTAGCAGCCATTGCCGTTCTGACAAAAGATGCAGGCAAGCTAACTATGGGACAGCCGCTAGTCATCCTGGCC 3919  
N417\_MuLV HQ246218 TACGGATGGTAGCAGCCATTGCCGTTCTGACAAAAGATGCAGGCAAGCTAACTATGGGACAGCCGCTAGTCATCCTGGCC 3919  
DG75\_MuLV AF221065 TACGGATGGTAGCAGCCATTGCCGTTCTGACAAAAGATGCAGGCAAGCTAACTATGGGACAGCCGCTAGTCATCCTGGCC 3905  
VP62\_XMRV DQ399707 TACGGATGGTAGCAGCCATTGCCGTTCTGACAAAATGCAGGCAAGCTAACTATGGGACAGCCGCTAGTCATCTGGCC 3891  
MCF1233\_MuLV U13766 TACGGATGGTAGCAGCCATTGCCGTTCTGACAAAAGATGCAGGCAAGCTAACTATGGGACAGCCGCTAGTCATCCTGGCC 3916

Majority CCCCATGCAGTAGAGGCACTGGTCAAGCAACCCCTGACCGCTGGCTATCCAACGCCCGCATGACCCACTACCAGGCAAT  
3930 3940 3950 3960 3970 3980 3990 4000

JY\_MuLV CCCCATGCAGTAGAGGCACTGGTCAAGCAACCCCTGACCGCTGGCTATCCAACGCCCGCATGACCCACTACCAGGCAAT 3999  
N417\_MuLV HQ246218 CCCCATGCAGTAGAGGCACTGGTCAAGCAACCCCTGACCGCTGGCTATCCAACGCCCGCATGACCCACTACCAGGCAAT 3999  
DG75\_MuLV AF221065 CCCCATGCAGTAGAGGCACTGGTCAAGCAACCCCTGACCGCTGGCTATCCAAGGCCCGCATGACCCACTACCAGGCAAT 3985  
VP62\_XMRV DQ399707 CCCCATGCAGTAGAGGCACTGGTCAAGCAACCCCTGACCGCTGGCTATCCAAGGCCCGCATGACCCACTACCAGGCAAT 3971  
MCF1233\_MuLV U13766 CCCCATGCAGTAGAGGCACTGGTCAAGCAACCCCTGACCGCTGGCTATCCAACGCCCGCATGACCCACTACCAGGCAAT 3996

Majority GTCCTAGACACTGACCGAGTTCAGTTCGGACCAGTGGTGGCCCTCAATCCTGCCACCTTGCTCCCTCTACCGGAAAAAG  
4010 4020 4030 4040 4050 4060 4070 4080

JY\_MuLV GTCCTAGACACTGACCGAGTTCAGTTCGGACCAGTGGTGGCCCTCAATCCTGCCACCTTGCTCCCTCTACCGGAAAAAG 4079  
N417\_MuLV HQ246218 GTCCTAGACACTGACCGAGTTCAGTTCGGACCAGTGGTGGCCCTCAATCCTGCCACCTTGCTCCCTCTACCGGAAAAAG 4079  
DG75\_MuLV AF221065 GTCCTAGACACTGACCGAGTTCAGTTCGGACCAGTGGTGGCCCTCAATCCTGCCACCTTGCTCCCTCTACCGGAAAAAG 4065  
VP62\_XMRV DQ399707 GTCCTAGACACTGACCGAGTTCAGTTCGGACCAGTGGTGGCCCTCAATCCTGCCACCTTGCTCCCTCTACCGGAAAAAG 4051  
MCF1233\_MuLV U13766 GTCCTAGACACTGACCGAGTTCAGTTCGGACCAGTGGTGGCCCTCAATCCTGCCACCTTGCTCCCTCTACCGGAAAAAG 4076

Majority GAGCCCCCATGATTGCCTCGAGATCTTGCTGAAACGCATGGAACCAGACCGGATCTCACCGACCAGCCCATCCCAGAC  
4090 4100 4110 4120 4130 4140 4150 4160

JY\_MuLV GAGCCCCCATGATTGCCTCGAGATCTTGCTGAAACGCATGGAACCAGACCGGATCTCACCGACCAGCCCATCCCAGAC 4159  
N417\_MuLV HQ246218 GAGCCCCCATGATTGCCTCGAGATCTTGCTGAAACGCATGGAACCAGACCGGATCTCACCGACCAGCCCATCCCAGAC 4159  
DG75\_MuLV AF221065 GAGCCCCCATGATTGCCTCGAGATCTTGCTGAAACGCATGGAACCAGACCGGATCTCACCGACCAGCCCATCCCAGAC 4145  
VP62\_XMRV DQ399707 GAGCCCCCATGATTGCCTCGAGATCTTGCTGAAACGCATGGAACCAGACCGGATCTCACCGACCAGCCCATCCCAGAC 4131  
MCF1233\_MuLV U13766 GAGCCCCCATGATTGCCTCGAGATCTTGCTGAAACGCATGGAACCAGACCGGATCTCACCGACCAGCCCATCCCAGAC 4156

Majority GCCGACCACACCTGGTATACCGATGGGAGCAGCTTTCTGCAAGAAGGACAGCGAAAGGCTGGGGCAGCAGTGACGACTGA  
4170 4180 4190 4200 4210 4220 4230 4240

JY\_MuLV GCCGACCACACCTGGTATACCGATGGGAGCAGCTTTCTGCAAGAAGGACAGCGAAAGGCTGGGGCAGCAGTGACGACTGA 4239  
N417\_MuLV HQ246218 GCCGACCACACCTGGTATACCGATGGGAGCAGCTTTCTGCAAGAAGGACAGCGAAAGGCTGGGGCAGCAGTGACGACTGA 4239  
DG75\_MuLV AF221065 GCCGACCACACCTGGTATACCGATGGGAGCAGCTTTCTGCAAGAAGGACAGCGAAAGGCTGGGGCAGCAGTGACGACTGA 4225  
VP62\_XMRV DQ399707 GCCGACCACACCTGGTATACCGATGGGAGCAGCTTTCTGCAAGAAGGACAGCGAAAGGCTGGGGCAGCAGTGACGACTGA 4211  
MCF1233\_MuLV U13766 GCCGACCACACCTGGTATACCGATGGGAGCAGCTTTCTGCAAGAAGGACAGCGAAAGGCTGGGGCAGCAGTGACGACTGA 4236

Majority GACCGAGGTAATCTGGGCGAGGGCCCTGCCAGCTGGAACGTCAGCCAGCGAGCCGAAGTATCGCACTCACCCAAGCCC  
4250 4260 4270 4280 4290 4300 4310 4320

JY\_MuLV AACCGAGGTAATCTGGGCGAGGGCCCTGCCAGCTGGAACGTCAGCCAGCGAGCCGAAGTATCGCACTCACCCAAGCCC 4319  
N417\_MuLV HQ246218 AACCGAGGTAATCTGGGCGAGGGCCCTGCCAGCTGGAACGTCAGCCAGCGAGCCGAAGTATCGCACTCACCCAAGCCC 4319  
DG75\_MuLV AF221065 GACCGAGGTAATCTGGGCGAGGGCCCTGCCAGCTGGAACGTCAGCCAGCGAGCCGAAGTATCGCACTCACCCAAGCCC 4305  
VP62\_XMRV DQ399707 GACCGAGGTAATCTGGGCGAGGGCCCTGCCAGCTGGAACGTCAGCCAGCGAGCCGAAGTATCGCACTCACCCAAGCCC 4291  
MCF1233\_MuLV U13766 GACCGAGGTAATCTGGGCGAGGGCCCTGCCAGCTGGAACGTCAGCCAGCGAGCCGAAGTATCGCACTCACCCAAGCCC 4316

Majority  
TGAAATGGCAGAAGTAAGAAGCTAAATGTTTACTGATAGCCGCTATGCCTTCGCCACGGCCCATGTCCATGGAGAA  
4330 4340 4350 4360 4370 4380 4390 4400

JY\_MuLV TGAAATGGCAGAAGTAAGAAGCTAAATGTTTACTGATAGCCGCTATGCCTTCGCCACGGCCCATGTCCATGGAGAA 4399  
N417\_MuLV HQ246218 TGAAATGGCAGAAGTAAGAAGCTAAATGTTTACTGATAGCCGCTATGCCTTCGCCACGGCCCATGTCCATGGAGAA 4399  
DG75\_MuLV AF221065 TAAAAATGGCAGAAGTAAGAAGCTAAATGTTTACTGATAGCCGCTATGCCTTCGCCACGGCCCATGTCCATGGAGAA 4385  
VP62\_XMRV DQ399707 TAAAGATGGCAGAAGTAAGAAGCTAAATGTTTACTGATAGCCGCTATGCCTTCGCCACGGCCCATGTCCATGGAGAA 4371  
MCF1233\_MuLV U13766 TGAAATGGCAGAAGTAAGAAGCTAAATGTTTACTGATAGCCGCTATGCCTTCGCCACGGCCCATGTCCATGGAGAA 4396

Majority  
ATATATAGGAGCGAGGGTTGCTGACCTCAGAAGGCAGAGAAATCAAAAACAAGAGCGAGATCCTGGCCTTGCTGAAAAGC  
4410 4420 4430 4440 4450 4460 4470 4480

JY\_MuLV ATATATAGGAGCGAGGGTTGCTGACCTCAGAAGGCAGAGAAATCAAAAACAAGAGCGAGATCCTGGCCTTGCTGAAAAGC 4479  
N417\_MuLV HQ246218 ATATATAGGAGCGAGGGTTGCTGACCTCAGAAGGCAGAGAAATCAAAAACAAGAGCGAGATCCTGGCCTTGCTGAAAAGC 4479  
DG75\_MuLV AF221065 ATATATAGGAGCGAGGGTTGCTGACCTCAGAAGGCAGAGAAATCAAAAACAAGAGCGAGATCCTGGCCTTGCTGAAAAGC 4465  
VP62\_XMRV DQ399707 ATATATAGGAGCGAGGGTTGCTGACCTCAGAAGGCAGAGAAATCAAAAACAAGAGCGAGATCCTGGCCTTGCTGAAAAGC 4451  
MCF1233\_MuLV U13766 ATATATAGGAGCGAGGGTTGCTGACCTCAGAAGGCAGAGAAATCAAAAACAAGAGCGAGATCCTGGCCTTGCTGAAAAGC 4476

Majority  
TCTCTTTCTGCCAAGAGACTCAGTATAATCCACTGCCAGGACATCAAAAAGGAGACAGTGCCGAAGCCAGAGGCAACC  
4490 4500 4510 4520 4530 4540 4550 4560

JY\_MuLV TCTCTTTCTGCCAAGAGACTCAGTATAATCCACTGCCAGGACATCAAAAAGGAGACAGTGCCGAAGCCAGAGGCAACC 4559  
N417\_MuLV HQ246218 TCTCTTTCTGCCAAGAGACTCAGTATAATCCACTGCCAGGACATCAAAAAGGAGACAGTGCCGAAGCCAGAGGCAACC 4559  
DG75\_MuLV AF221065 TCTCTTTCTGCCAAGAGACTCAGTATAATCCACTGCCAGGACATCAAAAAGGAGACAGTGCCGAAGCCAGAGGCAACC 4545  
VP62\_XMRV DQ399707 TCTCTTTCTGCCAAGAGACTCAGTATAATCCACTGCCAGGACATCAAAAAGGAGACAGTGCCGAAGCCAGAGGCAACC 4531  
MCF1233\_MuLV U13766 TCTCTTTCTGCCAAGAGACTCAGTATAATCCACTGCCAGGACATCAAAAAGGAGACAGTGCCGAAGCCAGAGGCAACC 4556

Majority  
GTATGGCAGACCAAGCGGCCGAGAGGCAGCCATAAAGACAGTTCCAGAAACCTCTACTCCTTATAGAGGACTCGACC  
4570 4580 4590 4600 4610 4620 4630 4640

JY\_MuLV GTATGGCAGACCAAGCGGCCGAGAGGCAGCCATAAAGACAGTTCCAGAAACCTCTACTCCTTATAGAGGACTCGACC 4639  
N417\_MuLV HQ246218 GTATGGCAGACCAAGCGGCCGAGAGGCAGCCATAAAGACAGTTCCAGAAACCTCTACTCCTTATAGAGGACTCGACC 4639  
DG75\_MuLV AF221065 GTATGGCAGACCAAGCGGCCGAGAGGCAGCCATAAAGACAGTTCCAGAAACCTCTACTCCTTATAGAGGACTCGACC 4625  
VP62\_XMRV DQ399707 GTATGGCAGACCAAGCGGCCGAGAGGCAGCCATAAAGACAGTTCCAGAAACCTCTACTCCTTATAGAGGACTCGACC 4611  
MCF1233\_MuLV U13766 GTATGGCAGACCAAGCGGCCGAGAGGCAGCCATAAAGACAGTTCCAGAAACCTCTACTCCTTATAGAGGACTCGACC 4636

Majority  
CCGTATACGCCTGCCTATTTCCATTACACCGAAACAGATCTAAAAGATTXCGAGAAGTGGGGGCCACCTATAATCAGAT  
4650 4660 4670 4680 4690 4700 4710 4720

JY\_MuLV CCGTATACGCCTGCCTATTTCCATTACACCGAAACAGATCTAAAAGATTXCGAGAAGTGGGGGCCACCTATAATCAGAT 4719  
N417\_MuLV HQ246218 CCGTATACGCCTGCCTATTTCCATTACACCGAAACAGATCTAAAAGATTXCGAGAAGTGGGGGCCACCTATAATCAGAT 4719  
DG75\_MuLV AF221065 CCGTATACGCCTGCCTATTTCCATTACACCGAAACAGATCTAAAAGATTXCGAGAAGTGGGGGCCACCTATAATCAGAT 4705  
VP62\_XMRV DQ399707 CCGTATACGCCTGCCTATTTCCATTACACCGAAACAGATCTAAAAGATTXCGAGAAGTGGGGGCCACCTATAATCAGAT 4691  
MCF1233\_MuLV U13766 CCGTATACGCCTGCCTATTTCCATTACACCGAAACAGATCTAAAAGATTXCGAGAAGTGGGGGCCACCTATAATCAGAT 4716

Majority  
AAAAGGATATTGGTCTACAAGGCAAGCCGGTGATGCCGATCAGTTTGTGTTTGAAGTATTAGACTCCCTCACAGAC  
4730 4740 4750 4760 4770 4780 4790 4800

JY\_MuLV AAAAGGATATTGGTCTACAAGGCAAGCCGGTGATGCCGATCAGTTTGTGTTTGAAGTATTAGACTCCCTCACAGAC 4799  
N417\_MuLV HQ246218 AAAAGGATATTGGTCTACAAGGCAAGCCGGTGATGCCGATCAGTTTGTGTTTGAAGTATTAGACTCCCTCACAGAC 4799  
DG75\_MuLV AF221065 AAAAGGATATTGGTCTACAAGGCAAGCCGGTGATGCCGATCAGTTTGTGTTTGAAGTATTAGACTCCCTCACAGAC 4785  
VP62\_XMRV DQ399707 AAAAGGATATTGGTCTACAAGGCAAGCCGGTGATGCCGATCAGTTTGTGTTTGAAGTATTAGACTCCCTCACAGAC 4771  
MCF1233\_MuLV U13766 AAAAGGATATTGGTCTACAAGGCAAGCCGGTGATGCCGATCAGTTTGTGTTTGAAGTATTAGACTCCCTCACAGAC 4796

Majority TCACCCATCTCAGCCCTCAAAGATGAAGGCACTCCTTGACAGAGAAGAAAGCCCCCTACTACATGTTAAACAGGGACAGA  
4810 4820 4830 4840 4850 4860 4870 4880

JY\_MuLV TCACCCATCTCAGCCCTCAAAGATGAAGGCTCCTTGACAGAGAAGAAAGCCCCCTACTACATGTTAAACAGGGACAGA 4879  
N417\_MuLV HQ246218 TCACCCATCTCAGCCCTCAAAGATGAAGGCTCCTTGACAGAGAAGAAAGCCCCCTACTACATGTTAAACAGGGACAGA 4879  
DG75\_MuLV AF221065 TCACCTCAGCCCTCAAAGATGAAGGCACTCCTTGACAGAGAAGAAAGCCCCCTACTACATGTTAAACAGGGACAGA 4865  
VP62\_XMRV DQ399707 TCACCCATCTCAGCCCTCAAAGATGAAGGCACTCCTTGACAGAGAAGAAAGCCCCCTACTACATGTTAAACAGGGACAGA 4851  
MCF1233\_MuLV U13766 TCACCCACTCGGCTAGCAGAAATGAAAGCACTCCTTGACAGAGAAGAAAGCCCCCTACTACATGTTAAACAGGGACAAA 4876

Majority ACTCTCCAGTATGTGGCAGAATCCTGCACAGTCTGTGCTCAAGTAAATGCTAGTAAAGCCAAAATCGGGGCAGGGGTACG  
4890 4900 4910 4920 4930 4940 4950 4960

JY\_MuLV ACTCTCAGTATGTGGCAGAATCCTGCACAGTCTGTGCTCAAGTAAATGCTAGTAAAGCCAAAATCGGGGCAGGGGTACG 4959  
N417\_MuLV HQ246218 ACTCTCAGTATGTGGCAGAATCCTGCACAGTCTGTGCTCAAGTAAATGCTAGTAAAGCCAAAATCGGGGCAGGGGTACG 4959  
DG75\_MuLV AF221065 ACTCTCCAGTATGTGGCAGAATCCTGCACAGTCTGTGCTCAAGTAAATGCTAGTAAAGCCAAAATCGGGGCAGGGGTACG 4945  
VP62\_XMRV DQ399707 ACTCTCCAGTATGTGACCTGAGACCTGCACCGCTGTGCTCAAGTAAATGCTAGTAAAGCCAAAATCGGGGCAGGGGTACG 4931  
MCF1233\_MuLV U13766 ACTCTCCAATATGTGGCAGATTCCTGCACGGTCTGTGCTCAAGTAAATGCTAGTAAAGCCAAAATCGGGGCAGGGGTACG 4956

Majority AGTACGCGGACATCGACCAGGTACCCATTGGGAAATTGACTTCACTGAAGTTAAGCCAGGGCTGTACGGGTACAAGTACC  
4970 4980 4990 5000 5010 5020 5030 5040

JY\_MuLV AGTACGCGGACATCGACCAGGTACCCATTGGGAAATTGACTTCACTGAAGTTAAGCCAGGGCTGTACGGGTACAAGTACC 5039  
N417\_MuLV HQ246218 AGTACGCGGACATCGACCAGGTACCCATTGGGAAATTGACTTCACTGAAGTTAAGCCAGGGCTGTACGGGTACAAGTACC 5039  
DG75\_MuLV AF221065 AATACGCGGACATCGACCAGGTACCCATTGGGAAATTGACTTCACTGAAGTTAAGCCAGGGCTGTACGGGTACAAGTACC 5025  
VP62\_XMRV DQ399707 AGTACGCGGACATCGACCAGGTACCCATTGGGAAATTGACTTCACTGAAGTTAAGCCAGGGCTGTACGGGTACAAGTACC 5011  
MCF1233\_MuLV U13766 AGTACGAGGACATCGACCAGGTACCCATTGGGAAATTGACTTCACTGAAGTTAAGCCAGGGCTGTACGGGTACAAGTACC 5036

Majority TCCTGGTGTTCGTAGACACCTTCTCTGGCTGGGTAGAAAGCCTTCCCAACTAAACGTGAAACTGCCAAGGTGACCAAG  
5050 5060 5070 5080 5090 5100 5110 5120

JY\_MuLV TCCTGGTGTTCGTAGACACCTTCTCTGGCTGGGTAGAAAGCCTTCCCAACTAAACGTGAAACTGCCAAGGTGACCAAG 5119  
N417\_MuLV HQ246218 TCCTGGTGTTCGTAGACACCTTCTCTGGCTGGGTAGAAAGCCTTCCCAACTAAACGTGAAACTGCCAAGGTGACCAAG 5119  
DG75\_MuLV AF221065 TCCTAGTGTTCGTAGACACCTTCTCTGGCTGGGTAGAAAGCCTTCCCAACTAAACGTGAAACTGCCAAGGTGACCAAG 5105  
VP62\_XMRV DQ399707 TCCTAGTGTTCGTAGACACCTTCTCTGGCTGGGTAGAAAGCCTTCCCAACTAAACGTGAAACTGCCAAGGTGACCAAG 5091  
MCF1233\_MuLV U13766 TCCTGGTATTCGTAGACACCTTCTCTGGCTGGGTAGAAAGCCTTCCCAACTAAACGTGAAACTGCCAAGGTGACCAAG 5116

Majority AAGCTATTAGAAGAAATATTCCAAGATTCGGGATGCCACAGGTATTGGGTTCTGATAATGGGCCTGCCTTCGTCTCCA  
5130 5140 5150 5160 5170 5180 5190 5200

JY\_MuLV AAGCTATTAGAAGAAATATTCCAAGATTCGGGATGCCACAGGTATTGGGTTCTGATAATGGGCCTGCCTTCGTCTCCA 5199  
N417\_MuLV HQ246218 AAGCTATTAGAAGAAATATTCCAAGATTCGGGATGCCACAGGTATTGGGTTCTGATAATGGGCCTGCCTTCGTCTCCA 5199  
DG75\_MuLV AF221065 AAGCTATTAGAAGAAATATTCCAAGATTCGGGATGCCACAGGTATTGGGTTCTGATAATGGGCCTGCCTTCGTCTCCA 5185  
VP62\_XMRV DQ399707 AAGCTATTAGAAGAAATATTCCAAGATTCGGGATGCCACAGGTATTGGGTTCTGATAATGGGCCTGCCTTCGTCTCCA 5171  
MCF1233\_MuLV U13766 AATAGCTTGAAGAAATATTCCAAGATTCGGGATGCCACAGGTATTGGGTTCTGATAATGGGCCTGCCTTCGTCTCCA 5196

Majority GGTAAGTCAGTCGGTGGCCGATTTACTGGGGATCGATTGAAATTACATTGTGCTTATAGACCCAGAGTTCAGGTCAGG  
5210 5220 5230 5240 5250 5260 5270 5280

JY\_MuLV GGTAAGTCAGTCGGTGGCCGATTTACTGGGGATCGATTGAAATTACATTGTGCTTATAGACCCAGAGTTCAGGTCAGG 5279  
N417\_MuLV HQ246218 GGTAAGTCAGTCGGTGGCCGATTTACTGGGGATCGATTGAAATTACATTGTGCTTATAGACCCAGAGTTCAGGTCAGG 5279  
DG75\_MuLV AF221065 GGTAAGTCAGTCGGTGGCCGATTTACTGGGGATCGATTGAAATTACATTGTGCTTATAGACCCAGAGTTCAGGTCAGG 5265  
VP62\_XMRV DQ399707 GGTAAGTCAGTCAGTGGCCGATTTACTGGGGATCGATTGAAATTACATTGTGCTTATAGACCCAGAGTTCAGGTCAGG 5251  
MCF1233\_MuLV U13766 GGTAAGTCAGTCGGTGGCCGATTTACTGGGGATCGATTGAAATTACATTGTGCTTATAGACCCAGAGTTCAGGTCAGG 5276

Majority TAGAAGAATGAATAGAACCATCAAGGAGACTCTAACTAAATTAACGCTTGCAGCTGGCACTAGAGACTGGGTACTCCTA  
5290 5300 5310 5320 5330 5340 5350 5360

JY\_MuLV TAGAAGAATGAATAGAACCATCAAGGAGACTCTAACTAAATTAACGCTTGCAGCTGGCACTAGAGACTGGGTACTCCTA 5359  
N417\_MuLV HQ246218 TAGAAGAATGAATAGAACCATCAAGGAGACTCTAACTAAATTAACGCTTGCAGCTGGCACTAGAGACTGGGTACTCCTA 5359  
DG75\_MuLV AF221065 TAGAAGAATGAATAGAACCATCAAGGAGACTCTAACTAAATTAACGCTTGCAGCTGGCACTAGAGACTGGGTACTCCTA 5345  
VP62\_XMRV DQ399707 TAGAAGAATGAATAGAACCATCAAGGAGACTCTAACTAAATTAACGCTTGCAGCTGGCACTAGAGACTGGGTACTCCTA 5331  
MCF1233\_MuLV U13766 TAGAAGAATGAATAGAACCATCAAGGAGACTCTAACTAAATTAACGCTTGCAGCTGGCACTAGAGACTGGGTACTCCTA 5356

Majority CTCCCCTTAGCCCTCTACCGAGCCCGGAACACTCCGGGCCCCATGGACTGACTCCGTATGAAATTCTGTATGGGGCACC  
5370 5380 5390 5400 5410 5420 5430 5440

JY\_MuLV CTCCCCTTAGCCCTCTACCGAGCCCGGAACACTCCGGGCCCCATGGACTGACTCCGTATGAAATTCTGTATGGGGCACC 5439  
N417\_MuLV HQ246218 CTCCCCTTAGCCCTCTACCGAGCCCGGAACACTCCGGGCCCCATGGACTGACTCCGTATGAAATTCTGTATGGGGCACC 5439  
DG75\_MuLV AF221065 CTCCCCTTAGCCCTCTACCGAGCCCGGAACACTCCGGGCCCCATGGACTGACTCCGTATGAAATTCTGTATGGGGCACC 5425  
VP62\_XMRV DQ399707 CTCCCCTTAGCCCTCTACCGAGCCCGGAACACTCCGGGCCCCATGGACTGACTCCGTATGAAATTCTGTATGGGGCACC 5411  
MCF1233\_MuLV U13766 CTCCCCTTAGCCCTCTACCGAGCCCGGAACACTCCGGGCCCCATGGACTGACTCCGTATGAAATTCTGTATGGGGCACC 5436

Majority CCCGCCCTTGCAATTTTCATGATCCTGAAATGTCAAAGTAACTAATAGTCCCTCTCTCCAAGCTCACTTACAGGCC  
5450 5460 5470 5480 5490 5500 5510 5520

JY\_MuLV CCCGCCCTTGCAATTTTCATGATCCTGAAATGTCAAAGTAACTAATAGTCCCTCTCTCCAAGCTCACTTACAGGCC 5519  
N417\_MuLV HQ246218 CCCGCCCTTGCAATTTTCATGATCCTGAAATGTCAAAGTAACTAATAGTCCCTCTCTCCAAGCTCACTTACAGGCC 5519  
DG75\_MuLV AF221065 CCCGCCCTTGCAATTTTCATGATCCTGAAATGTCAAAGTAACTAATAGTCCCTCTCTCCAAGCTCACTTACAGGCC 5505  
VP62\_XMRV DQ399707 CCCGCCCTTGCAATTTTCATGATCCTGAAATGTCAAAGTAACTAATAGTCCCTCTCTCCAAGCTCACTTACAGGCC 5491  
MCF1233\_MuLV U13766 CCCGCCCTTGCAATTTTCATGATCCTGAAATGTCAAAGTAACTAATAGTCCCTCTCTCCAAGCTCACTTACAGGCC 5513

Majority TCCAAGCAGTACAACGAGAGGTCTGGAAGCCGCTGGCCGCTGCTTATCAGGACCAGCTAGATCAGCCAGTGATACCCAC  
5530 5540 5550 5560 5570 5580 5590 5600

JY\_MuLV TCCAAGCAGTACAACGAGAGGTCTGGAAGCCGCTGGCCGCTGCTTATCAGGACCAGCTAGATCAGCCAGTGATACCCAC 5599  
N417\_MuLV HQ246218 TCCAAGCAGTACAACGAGAGGTCTGGAAGCCGCTGGCCGCTGCTTATCAGGACCAGCTAGATCAGCCAGTGATACCCAC 5599  
DG75\_MuLV AF221065 TCCAAGCAGTACAACGAGAGGTCTGGAAGCCGCTGGCCGCTGCTTATCAGGACCAGCTAGATCAGCCAGTGATACCCAC 5585  
VP62\_XMRV DQ399707 TCCAAGCAGTACAACGAGAGGTCTGGAAGCCGCTGGCCGCTGCTTATCAGGACCAGCTAGATCAGCCAGTGATACCCAC 5571  
MCF1233\_MuLV U13766 TCCAAGCAGTACAACGAGAGGTCTGGAAGCCGCTGGCCGCTGCTTATCAGGACCAGCTAGATCAGCCAGTGATACCCAC 5593

Majority CCCTTCCGTGTCGGTGACGCCGTGTGGGTACGCCGGCACCAGACTAAGAACTTGAACCTCGCTGGAAGGACCCTACAC  
5610 5620 5630 5640 5650 5660 5670 5680

JY\_MuLV CCCTTCCGTGTCGGTGACGCCGTGTGGGTACGCCGGCACCAGACTAAGAACTTGAACCTCGCTGGAAGGACCCTACAC 5679  
N417\_MuLV HQ246218 CCCTTCCGTGTCGGTGACGCCGTGTGGGTACGCCGGCACCAGACTAAGAACTTGAACCTCGCTGGAAGGACCCTACAC 5679  
DG75\_MuLV AF221065 CCCTTCCGTGTCGGTGACGCCGTGTGGGTACGCCGGCACCAGACTAAGAACTTGAACCTCGCTGGAAGGACCCTACAC 5665  
VP62\_XMRV DQ399707 CCCTTCCGTGTCGGTGACGCCGTGTGGGTACGCCGGCACCAGACTAAGAACTTGAACCTCGCTGGAAGGACCCTACAC 5651  
MCF1233\_MuLV U13766 CCCTTCCGTGTCGGTGACGCCGTGTGGGTACGCCGGCACCAGACTAAGAACTTGAACCTCGCTGGAAGGACCCTACAC 5673

Majority CGTCCTGCTGACCACCCACCCTCTCAAAGTAGACGGCATCTCTGCGTGGATACACGCCGCTCACGTAAGGCGGCGA  
5690 5700 5710 5720 5730 5740 5750 5760

JY\_MuLV CGTCCTGCTGACCACCCACCCTCTCAAAGTAGACGGCATCTCTGCGTGGATACACGCCGCTCACGTAAGGCGGCGA 5759  
N417\_MuLV HQ246218 CGTCCTGCTGACCACCCACCCTCTCAAAGTAGACGGCATCTCTGCGTGGATACACGCCGCTCACGTAAGGCGGCGA 5759  
DG75\_MuLV AF221065 CGTCCTGCTGACCACCCACCCTCTCAAAGTAGACGGCATCTCTGCGTGGATACACGCCGCTCACGTAAGGCGGCGA 5745  
VP62\_XMRV DQ399707 CGTCCTGCTGACCACCCACCCTCTCAAAGTAGACGGCATCTCTGCGTGGATACACGCCGCTCACGTAAGGCGGCGA 5731  
MCF1233\_MuLV U13766 CGTCCTGCTGACCACCCACCCTCTCAAAGTAGACGGCATCTCTGCGTGGATACACGCCGCTCACGTAAGGCGGCGA 5753

Majority CAACTCCTCCGGCCGGAACAGCAT-----GGAAGGTCCAGCGTTCTCAAAACCCCTTAAAGATAAGATTAACC  
5770 5780 5790 5800 5810 5820 5830 5840  
JY\_MuLV CAACTCCTCCGGCCGGAACAGCAT-----GGAAGGTCCAGCGTTCTCAAAACCCCTTAAAGATAAGATTAACC 5827  
N417\_MuLV HQ246218 CAACTCCTCCGGCCGGAACAGCAT-----GGAAGGTCCAGCGTTCTCAAAACCCCTTAAAGATAAGATTAACC 5827  
DG75\_MuLV AF221065 CAACTCCTCCAGCCGGAACAGCAT-----GGAAGGTCCAGCGTTCTCAAAACCCCTTAAAGATAAGATTAACC 5813  
VP62\_XMRV DQ399707 CAACTCCTCCGGCCGGAACAGCAT-----GGAAGGTCCAGCGTTCTCAAAACCCCTTAAAGATAAGATTAACC 5799  
MCF1233\_MuLV U13766 CAACCTCCTCCGGCCAGAACAGCATCAGGACCGACA-----GGAAGGTCCAGCGTTCTCAAAACCCCTTAAAGATAAGATTAACC 5833

Majority CGTGGGGCCCCCTAATAGTTATGGGGATCTTGGTGAGGGCAGGAGCCTCGGTACAACGTGACAGCCCTCACCAGGTCTTC  
5850 5860 5870 5880 5890 5900 5910 5920  
JY\_MuLV CGTGGGGCCCCCTAATAGTTATAGGGATCTTGGTGAGGGCAGGAGCCTCGGTACAACGTGACAGCCCTCACCAGGTCTTC 5907  
N417\_MuLV HQ246218 CGTGGGGCCCCCTAATAGTTATAGGGATCTTGGTGAGGGCAGGAGCCTCGGTACAACGTGACAGCCCTCACCAGGTCTTC 5907  
DG75\_MuLV AF221065 CGTGGGGCCCCCTAATAGTTATGGGGATCTTGGTGAGGGCAGGAGCCTCGGTACAACGTGACAGCCCTCACCAGGTCTTC 5893  
VP62\_XMRV DQ399707 CGTGGGGCCCCCTAATAGTTATGGGGATCTTGGTGAGGGCAGGAGCCTCGGTACAACGTGACAGCCCTCACCAGGTCTTC 5879  
MCF1233\_MuLV U13766 CGTGGGGCCCCCTAATAATCCTGGGGATCTTAAAGGGCAGGAGTATCAGTACAACATGACAGCCCTCACCAGGTCTTC 5913

Majority AATGTCACCTGGAGAGTTACCAACCTAATGACAGGACAAACAGCTAACGCTACCTCCCTCCTGGGGACGATGACAGACAC  
5930 5940 5950 5960 5970 5980 5990 6000  
JY\_MuLV AATGTCACCTGGAGAGTTACCAACCTAATGACAGGACAAACAGCTAACGCTACCTCCCTCCTGGGGACGATGACAGACAC 5987  
N417\_MuLV HQ246218 AATGTCACCTGGAGAGTTACCAACCTAATGACAGGACAAACAGCTAACGCTACCTCCCTCCTGGGGACGATGACAGACAC 5987  
DG75\_MuLV AF221065 AATGTCACCTGGAGAGTTACCAACCTAATGACAGGACAAACAGCTAACGCTACCTCCCTCCTGGGGACGATGACAGACAC 5973  
VP62\_XMRV DQ399707 AATGTCACCTGGAGAGTTACCAACCTAATGACAGGACAAACAGCTAACGCTACCTCCCTCCTGGGGACGATGACAGACAC 5959  
MCF1233\_MuLV U13766 AATGTCACCTGGAGAGTTACCAACCTAATGACAGGACAAACAGCTAACGCTACCTCCCTCCTGGGGACGATGACAGACAC 5993

Majority CTTCCCTAAACTATATTTTGACTTGTGTGATTTAGTTGGAGACCACTGGGATGACCCAGAACCCGATATTGGAGATGGTT  
6010 6020 6030 6040 6050 6060 6070 6080  
JY\_MuLV CTTCCCTAAACTATATTTTGACTTGTGTGATTTAGTTGGAGACCACTGGGATGACCCAGAACCCGATATTGGAGATGGTT 6067  
N417\_MuLV HQ246218 CTTCCCTAAACTATATTTTGACTTGTGTGATTTAGTTGGAGACCACTGGGATGACCCAGAACCCGATATTGGAGATGGTT 6067  
DG75\_MuLV AF221065 CTTCCCTAAACTATATTTTGACTTGTGTGATTTAGTTGGAGACCACTGGGATGACCCAGAACCCGATATTGGAGATGGTT 6053  
VP62\_XMRV DQ399707 CTTCCCTAAACTATATTTTGACTTGTGTGATTTAGTTGGAGACCACTGGGATGACCCAGAACCCGATATTGGAGATGGTT 6039  
MCF1233\_MuLV U13766 CTTCCCTAAACTATATTTTGACTTGTGTGATTTAGTTGGAGACCACTGGGATGACCCAGAACCCGATATTGGAGATGGTT 6061

Majority GCCGCTCTCCGGGGGAAGAAAAGGACAAGACTGTATGACTTCTATGTTTGCCCCGGTCATACTGTACCAATAGGGTGT  
6090 6100 6110 6120 6130 6140 6150 6160  
JY\_MuLV GCCGCTCTCCGGGGGAAGAAAAGGACAAGACTGTATGACTTCTATGTTTGCCCCGGTCATACTGTACCAATAGGGTGT 6147  
N417\_MuLV HQ246218 GCCGCTCTCCGGGGGAAGAAAAGGACAAGACTGTATGACTTCTATGTTTGCCCCGGTCATACTGTACCAATAGGGTGT 6147  
DG75\_MuLV AF221065 GCCGCTCTCCGGGGGAAGAAAAGGACAAGACTGTATGACTTCTATGTTTGCCCCGGTCATACTGTACCAATAGGGTGT 6133  
VP62\_XMRV DQ399707 GCCGCTCTCCGGGGGAAGAAAAGGACAAGACTGTATGACTTCTATGTTTGCCCCGGTCATACTGTACCAATAGGGTGT 6119  
MCF1233\_MuLV U13766 GCCGCTCTCCGGGGGAAGAAAAGGACAAGACTGTATGACTTCTATGTTTGCCCCGGTCATACTGTACCAATAGGGTGT 6141

Majority GGAGGGCCGGGAGAGGGCTACTGTGGCAAATGGGGATGTGAGACCACTGGACAGGCATACTGGAAGCCATCATCATCATG  
6170 6180 6190 6200 6210 6220 6230 6240  
JY\_MuLV GGAGGGCCGGGAGAGGGCTACTGTGGCAAATGGGGATGTGAGACCACTGGACAGGCATACTGGAAGCCATCATCATCATG 6227  
N417\_MuLV HQ246218 GGAGGGCCGGGAGAGGGCTACTGTGGCAAATGGGGATGTGAGACCACTGGACAGGCATACTGGAAGCCATCATCATCATG 6227  
DG75\_MuLV AF221065 GGAGGGCCGGGAGAGGGCTACTGTGGCAAATGGGGATGTGAGACCACTGGACAGGCATACTGGAAGCCATCATCATCATG 6213  
VP62\_XMRV DQ399707 GGAGGGCCGGGAGAGGGCTACTGTGGCAAATGGGGATGTGAGACCACTGGACAGGCATACTGGAAGCCATCATCATCATG 6199  
MCF1233\_MuLV U13766 GGAGGGCCGGGAGAGGGCTACTGTGGCAAATGGGGATGTGAGACCACTGGACAGGCATACTGGAAGCCATCATCATCATG 6221

Majority GGACCTAATTTCCCTTAAGCGAGGAAACACTCCTAAGGATCAGGGCCCTGTTATGATTCCTCXGXXGTCTCCAGTGGCG  
6250 6260 6270 6280 6290 6300 6310 6320

JY\_MuLV GGACCTAATTTCCCTTAAGCGAGGAAACACTCCTAAAGATCAGGGCCCTGTTATGATTCCTC --- GGTCTCCAGTGGCG 6304  
N417\_MuLV HQ246218 GGACCTAATTTCCCTTAAGCGAGGAAACACTCCTAAGGATCAGGGCCCTGTTATGATTCCTC --- GGTCTCCAGTGGCG 6304  
DG75\_MuLV AF221065 GGACCTAATTTCCCTTAAGCGAGGAAACACTCCTAAGGATCAGGGCCCTGTTATGATTCCTC GGT --- CTCCAGTGGCG 6290  
VP62\_XMRV DQ399707 GGACCTAATTTCCCTTAAGCGAGGAAACACTCCTAAGGATCAGGGCCCTGTTATGATTCCTC AGTGGCTCCGCTAGCA 6279  
MCF1233\_MuLV U13766 GGACCTAATTTCCCTTAAGCGAGGAAACACTCCCTCAGATCAGGGCCCTGTTATGATTCCTC AGTGGTCTCCAGTGA 6301

Majority TCCAGGTGCCACACCGGGGGTTCGATGCAACCCCTAGTCTTAGAATTCAGTACGCGGGTAAAAAGGCCAGCTGGGAT  
6330 6340 6350 6360 6370 6380 6390 6400

JY\_MuLV TCCAGGTGCCACACCGGGGGTTCGATGCAACCCCTAGTCTTAGAATTCAGTACGCGGGTAAAAAGGCCAGCTGGGAT 6384  
N417\_MuLV HQ246218 TCCAGGTGCCACACCGGGGGTTCGATGCAACCCCTAGTCTTAGAATTCAGTACGCGGGTAAAAAGGCCAGCTGGGAT 6384  
DG75\_MuLV AF221065 TCCAGGTGCCACACCGGGGGTTCGATGCAACCCCTAGTCTTAGAATTCAGTACGCGGGTAAAAAGGCCAGCTGGGAT 6370  
VP62\_XMRV DQ399707 TCCAGGTGCCACACCGGGGGTTCGATGCAACCCCTAGTCTTAGAATTCAGTACGCGGGTAAAAAGGCCAGCTGGGAT 6359  
MCF1233\_MuLV U13766 TCAAGGAGGCCACACCGGGGGTTCGATGCAATCCCTAGTCTTAGAATTCAGTACGCGGGTAAAAAGGCCAGCTGGGAT 6381

Majority GCCCCAAAGTTTGGGGACTAAGACTCTACCGATCCACXGGGGCCGACCCGGTGACCCGGTTCTCTTTGACCCGCCAGGT  
6410 6420 6430 6440 6450 6460 6470 6480

JY\_MuLV GCCCCAAAGTTTGGGGACTAAGACTCTACCGATCCACXGGGGCCGACCCGGTGACCCGGTTCTCTTTGACCCGCCAGGT 6464  
N417\_MuLV HQ246218 GCCCCAAAGTTTGGGGACTAAGACTCTACCGATCCACXGGGGCCGACCCGGTGACCCGGTTCTCTTTGACCCGCCAGGT 6464  
DG75\_MuLV AF221065 GCCCCAAAGTTTGGGGACTAAGACTCTACCGATCCACXGGGGCCGACCCGGTGACCCGGTTCTCTTTGACCCGCCAGGT 6450  
VP62\_XMRV DQ399707 GCCCCAAAGTTTGGGGACTAAGACTCTACCGATCCACXGGGGCCGACCCGGTGACCCGGTTCTCTTTGACCCGCCAGGT 6439  
MCF1233\_MuLV U13766 GCCCCAAAGTTTGGGGACTAAGACTCTACCGATCCACXGGGGCCGACCCGGTGACCCGGTTCTCTTTGACCCGCCAGGT 6461

Majority CCTCAATGTAGGACCCCGCTCCCCATTGGGCTAATCCCGTGATCACTGAACAGCTACCCCTCCCAACCCGTGCAGA  
6490 6500 6510 6520 6530 6540 6550 6560

JY\_MuLV CCTCAATGTAGGACCCCGCTCCCCATTGGGCTAATCCCGTGATCACTGAACAGCTACCCCTCCCAACCCGTGCAGA 6544  
N417\_MuLV HQ246218 CCTCAATGTAGGACCCCGCTCCCCATTGGGCTAATCCCGTGATCACTGAACAGCTACCCCTCCCAACCCGTGCAGA 6544  
DG75\_MuLV AF221065 CCTCAATGTAGGACCCCGCTCCCCATTGGGCTAATCCCGTGATCACTGAACAGCTACCCCTCCCAACCCGTGCAGA 6530  
VP62\_XMRV DQ399707 CCTCAATGTAGGACCCCGCTCCCCATTGGGCTAATCCCGTGATCACTGAACAGCTACCCCTCCCAACCCGTGCAGA 6519  
MCF1233\_MuLV U13766 CCTCAATGTAGGACCCCGCTCCCCATTGGGCTAATCCCGTGATCACTGAACAGCTACCCCTCCCAACCCGTGCAGA 6541

Majority TCATGCTCCCAGGCCTCCTCATCCTCCTCCTTCAGGCGGGCCTCTATGGTGCCTGGGGCTCCCCGCCTTCTCAACAA  
6570 6580 6590 6600 6610 6620 6630 6640

JY\_MuLV TCATGCTCCCAGGCCTCCTCATCCTCCTCCTTCAGGCGGGCCTCTATGGTGCCTGGGGCTCCCCGCCTTCTCAACAA 6624  
N417\_MuLV HQ246218 TCATGCTCCCAGGCCTCCTCATCCTCCTCCTTCAGGCGGGCCTCTATGGTGCCTGGGGCTCCCCGCCTTCTCAACAA 6624  
DG75\_MuLV AF221065 TCATGCTCCCAGGCCTCCTCATCCTCCTCCTTCAGGCGGGCCTCTATGGTGCCTGGGGCTCCCCGCCTTCTCAACAA 6610  
VP62\_XMRV DQ399707 TCATGCTCCCAGGCCTCCTCATCCTCCTCCTTCAGGCGGGCCTCTATGGTGCCTGGGGCTCCCCGCCTTCTCAACAA 6599  
MCF1233\_MuLV U13766 TCATGCTCCCAGGCCTCCTCATCCTCCTCCTTCAGGCGGGCCTCTATGGTGCCTGGGGCTCCCCGCCTTCTCAACAA 6621

Majority CCTGGGACGGGAGACAGGCTGCTAAACCTGGTAGAAGGAGCCTACCAAGCACTCAACCTCACCAGTCCCACAAAACCA  
6650 6660 6670 6680 6690 6700 6710 6720

JY\_MuLV CCTGGGACGGGAGACAGGCTGCTAAACCTGGTAGAAGGAGCCTACCAAGCACTCAACCTCACCAGTCCCACAAAACCA 6704  
N417\_MuLV HQ246218 CCTGGGACGGGAGACAGGCTGCTAAACCTGGTAGAAGGAGCCTACCAAGCACTCAACCTCACCAGTCCCACAAAACCA 6704  
DG75\_MuLV AF221065 CCTGGGACGGGAGACAGGCTGCTAAACCTGGTAGAAGGAGCCTACCAAGCACTCAACCTCACCAGTCCCACAAAACCA 6690  
VP62\_XMRV DQ399707 CCTGGGACGGGAGACAGGCTGCTAAACCTGGTAGAAGGAGCCTACCAAGCACTCAACCTCACCAGTCCCACAAAACCA 6679  
MCF1233\_MuLV U13766 CCTGGGACGGGAGACAGGCTGCTAAACCTGGTAGAAGGAGCCTACCAAGCACTCAACCTCACCAGTCCCACAAAACCA 6701

Majority AGAGTGTGGCTGTGTCTGGTATCGGGACCCCCCTACTACGAAGGGGTTGCCGTCCTAGGTACCTACTCCAACCATACT  
6730 6740 6750 6760 6770 6780 6790 6800

JY\_MuLV AGAGTGTGGCTGTGTCTGGTATCGGGACCCCCCTACTACGAAGGGGTTGCCGTCCTAGGTACCTACTCCAACCATACT 6784  
N417\_MuLV HQ246218 AGAGTGTGGCTGTGTCTGGTATCGGGACCCCCCTACTACGAAGGGGTTGCCGTCCTAGGTACCTACTCCAACCATACT 6784  
DG75\_MuLV AF221065 AGAGTGTGGCTGTGTCTGGTATCGGGACCCCCCTACTACGAAGGGGTTGCCGTCCTAGGTACCTACTCCAACCATACT 6770  
VP62\_XMRV DQ399707 AGAGTGTGGCTGTGTCTAGTATCGGGACCCCCCTACTACGAAGGGGTTGCCGTCCTAGGTACCTACTCCAACCATACT 6759  
MCF1233\_MuLV U13766 AGAGTGTGGCTGTGTCTGGTATCGGGACCCCCCTACTACGAAGGGGTTGCCGTCCTAGGTACCTACTCCAACCATACT 6781

Majority CTGCCCCAGCTAACTGCTCCGTGGCCTCCCAACACAAGCTGACCCTGTCCGAAGTGACCGGGCAGGGACTCTGCGTAGGA  
6810 6820 6830 6840 6850 6860 6870 6880

JY\_MuLV CTGCCCCAGCTAACTGCTCCGTGGCCTCCCAACACAAGCTGACCCTGTCCGAAGTGACCGGGCAGGGACTCTGCGTAGGA 6864  
N417\_MuLV HQ246218 CTGCCCCAGCTAACTGCTCCGTGGCCTCCCAACACAAGCTGACCCTGTCCGAAGTGACCGGGCAGGGACTCTGCGTAGGA 6864  
DG75\_MuLV AF221065 CTGCCCCAGCTAACTGCTCCGTGGCCTCCCAACACAAGCTGACCCTGTCCGAAGTGACCGGGCAGGGACTCTGCGTAGGA 6850  
VP62\_XMRV DQ399707 CTGCCCCAGCTAACTGCTCCGTGGCCTCCCAACACAAGCTGACCCTGTCCGAAGTGACCGGGCAGGGACTCTGCGTAGGA 6839  
MCF1233\_MuLV U13766 CTGCCCCAGCTAACTGCTCCGTGGCCTCCCAACACAAGCTGACCCTGTCCGAAGTGACCGGGCAGGGACTCTGCGTAGGA 6861

Majority GCAGTTCCTAAAACCCATCAGGCCCTGTGTAATACCACCCAGAAGACGAGCGACGGGTCTACTATCTGGCTGCTCCCGC  
6890 6900 6910 6920 6930 6940 6950 6960

JY\_MuLV GCAGTTCCTAAAACCCATCAGGCCCTGTGTAATACCACCCAGAAGACGAGCGACGGGTCTACTATCTGGCTGCTCCCGC 6944  
N417\_MuLV HQ246218 GCAGTTCCTAAAACCCATCAGGCCCTGTGTAATACCACCCAGAAGACGAGCGACGGGTCTACTATCTGGCTGCTCCCGC 6944  
DG75\_MuLV AF221065 GCAGTTCCTAAAACCCATCAGGCCCTGTGTAATACCACCCAGAAGACGAGCGACGGGTCTACTATCTGGCTGCTCCCGC 6930  
VP62\_XMRV DQ399707 GCAGTTCCTAAAACCCATCAGGCCCTGTGTAATACCACCCAGAAGACGAGCGACGGGTCTACTATCTGGCTGCTCCCGC 6919  
MCF1233\_MuLV U13766 GCAGTTCCTAAAACCCATCAGGCCCTGTGTAATACCACCCAGAAGACGAGCGACGGGTCTACTATCTGGCTGCTCCCGC 6941

Majority CGGGACCATCTGGGCTTGCAACACCGGGCTCACTCCCTGCCTATCTACCACTGTACTCAACCTCACCACCGATTACTGTG  
6970 6980 6990 7000 7010 7020 7030 7040

JY\_MuLV CGGGACCATCTGGGCTTGCAACACCGGGCTCACTCCCTGCCTATCTACCACTGTACTCAACCTCACCACCGATTACTGTG 7024  
N417\_MuLV HQ246218 CGGGACCATCTGGGCTTGCAACACCGGGCTCACTCCCTGCCTATCTACCACTGTACTCAACCTCACCACCGATTACTGTG 7024  
DG75\_MuLV AF221065 CGGGACCATCTGGGCTTGCAACACCGGGCTCACTCCCTGCCTATCTACCACTGTACTCAACCTCACCACCGATTACTGTG 7010  
VP62\_XMRV DQ399707 CGGGACCATCTGGGCTTGCAACACCGGGCTCACTCCCTGCCTATCTACCACTGTACTCAACCTCACCACCGATTACTGTG 6999  
MCF1233\_MuLV U13766 CGGGACCATCTGGGCTTGCAACACCGGGCTCACTCCCTGCCTATCTACCACTGTACTCAACCTCACCACCGATTACTGTG 7021

Majority TCCTGTTGAGCTCTGGCCAAAGGTGACCTACCACTCCCCTGGTTATGTTTATGACCAGTTTGAGAGAAAACCAAATAT  
7050 7060 7070 7080 7090 7100 7110 7120

JY\_MuLV TCCTGTTGAGCTCTGGCCAAAGGTGACCTACCACTCCCCTGGTTATGTTTATGACCAGTTTGAGAGAAAACCAAATAT 7104  
N417\_MuLV HQ246218 TCCTGTTGAGCTCTGGCCAAAGGTGACCTACCACTCCCCTGGTTATGTTTATGACCAGTTTGAGAGAAAACCAAATAT 7104  
DG75\_MuLV AF221065 TCCTGTTGAGCTCTGGCCAAAGGTGACCTACCACTCCCCTGGTTATGTTTATGACCAGTTTGAGAGAAAACCAAATAT 7090  
VP62\_XMRV DQ399707 TCCTGTTGAGCTCTGGCCAAAGGTGACCTACCACTCCCCTGGTTATGTTTATGACCAGTTTGAGAGAAAACCAAATAT 7079  
MCF1233\_MuLV U13766 TCCTGTTGAGCTCTGGCCAAAGGTGACCTACCACTCCCCTGGTTATGTTTATGACCAGTTTGAGAGAAAACCAAATAT 7101

Majority AAAAGAGAGCCGGTGTCACTAACTCTGGCCCTGCTGTTGGGAGGACTTACTATGGGCGGCATAGCTGCAGGAGTAGGAAC  
7130 7140 7150 7160 7170 7180 7190 7200

JY\_MuLV AAAAGAGAGCCGGTGTCACTAACTCTGGCCCTGCTGTTGGGAGGACTTACTATGGGCGGCATAGCTGCAGGAGTAGGAAC 7184  
N417\_MuLV HQ246218 AAAAGAGAGCCGGTGTCACTAACTCTGGCCCTGCTGTTGGGAGGACTTACTATGGGCGGCATAGCTGCAGGAGTAGGAAC 7184  
DG75\_MuLV AF221065 AAAAGAGAGCCGGTGTCACTAACTCTGGCCCTGCTGTTGGGAGGACTTACTATGGGCGGCATAGCTGCAGGAGTAGGAAC 7170  
VP62\_XMRV DQ399707 AAAAGAGAGCCGGTGTCACTAACTCTGGCCCTGCTGTTGGGAGGACTTACTATGGGCGGCATAGCTGCAGGAGTAGGAAC 7159  
MCF1233\_MuLV U13766 AAAAGAGAGCCGGTGTCACTAACTCTGGCCCTGCTGTTGGGAGGACTTACTATGGGCGGCATAGCTGCAGGAGTAGGAAC 7181

Majority AGGGACTACAGCCCTAGTGGCCACCAAACAATTCGAGCAGCTCCAGGCAGCCATACATACAGACCTTGGGG-CCTTAGAA  
7210 7220 7230 7240 7250 7260 7270 7280

JY\_MuLV AGGGACTACAGCCCTAGTGGCCACCAAACAATTCGAGCAGCTCCAGGCAGCCATACATACAGACCTTGGGG-CCTTAGAA 7263  
N417\_MuLV HQ246218 AGGGACTACAGCCCTAGTGGCCACCAAACAATTCGAGCAGCTCCAGGCAGCCATACATACAGACCTTGGGG-CCTTAGAA 7263  
DG75\_MuLV AF221065 AGGGACTACAGCCCTAGTGGCCACCAAACAATTCGAGCAGCTCCAGGCAGCCATACATACAGACCTTGGGG-CCTTAGAA 7249  
VP62\_XMRV DQ399707 AGGGACTACAGCCCTAGTGGCCACCAAACAATTCGAGCAGCTCCAGGCAGCCATACATACAGACCTTGGGG-CCTTAGAA 7238  
MCF1233\_MuLV U13766 CGGGACTACAGCCCTAGTGGCCACCAAACAATTCGAGCAGCTCCAGGCAGCCATACATACAGACCTTGGGG-CCTTAGAA 7260

Majority AAATCAGTCAGTGCCTAGAAAAGTCTCTGACCTCGTTGTCTGAGGTGGTCCTACAGAACCGGAGAGGATTAGATCTGCT  
7290 7300 7310 7320 7330 7340 7350 7360

JY\_MuLV AAATCAGTCAGTGCCTAGAAAAGTCTCTGACCTCGTTGTCTGAGGTGGTCCTACAGAACCGGAGAGGATTAGATCTGCT 7343  
N417\_MuLV HQ246218 AAATCAGTCAGTGCCTAGAAAAGTCTCTGACCTCGTTGTCTGAGGTGGTCCTACAGAACCGGAGAGGATTAGATCTGCT 7343  
DG75\_MuLV AF221065 AAATCAGTCAGTGCCTAGAAAAGTCTCTGACCTCGTTGTCTGAGGTGGTCCTACAGAACCGGAGAGGATTAGATCTGCT 7329  
VP62\_XMRV DQ399707 AAATCAGTCAGTGCCTAGAAAAGTCTCTGACCTCGTTGTCTGAGGTGGTCCTACAGAACCGGAGAGGATTAGATCTGCT 7318  
MCF1233\_MuLV U13766 AATCAGTCAGTGCCTAGAAAAGTCTCTGACCTCGTTGTCTGAGGTGGTCCTACAGAACCGGAGAGGATTAGATCTGCT 7340

Majority GTTCCTAAAAGAAGGAGGATTATGTGCTGCCCTAAAAGAAGAATGCTGTTTCTATGCGXGACCACACTGGCGTAGTAAGGG  
7370 7380 7390 7400 7410 7420 7430 7440

JY\_MuLV GTTCCTAAAAGAAGGAGGATTATGTGCTGCCCTAAAAGAAGAATGCTGTTTCTATGCGXGACCACACTGGCGTAGTAAGGG 7423  
N417\_MuLV HQ246218 GTTCCTAAAAGAAGGAGGATTATGTGCTGCCCTAAAAGAAGAATGCTGTTTCTATGCGXGACCACACTGGCGTAGTAAGGG 7423  
DG75\_MuLV AF221065 GTTCCTAAAAGAAGGAGGATTATGTGCTGCCCTAAAAGAAGAATGCTGTTTCTATGCGXGACCACACTGGCGTAGTAAGGG 7409  
VP62\_XMRV DQ399707 GTTCCTAAAAGAAGGAGGATTATGTGCTGCCCTAAAAGAAGAATGCTGTTTCTATGCGXGACCACACTGGCGTAGTAAGGG 7398  
MCF1233\_MuLV U13766 AATCAGTCAGTGCCTAGAAAAGTCTCTGACCTCGTTGTCTGAGGTGGTCCTACAGAACCGGAGAGGATTAGATCTGCT 7340

Majority ATAGCATGGCTAAGCTAAGAGAAAGGCTAAACCAGAGACAAAAATTGTTGGAATCAGGACAAGGGTGGTTTGAGGGACTG  
7450 7460 7470 7480 7490 7500 7510 7520

JY\_MuLV ATAGCATGGCTAAGCTAAGAGAAAGGCTAAACCAGAGACAAAAATTGTTGGAATCAGGACAAGGGTGGTTTGAGGGACTG 7503  
N417\_MuLV HQ246218 ATAGCATGGCTAAGCTAAGAGAAAGGCTAAACCAGAGACAAAAATTGTTGGAATCAGGACAAGGGTGGTTTGAGGGACTG 7503  
DG75\_MuLV AF221065 ATAGCATGGCTAAGCTAAGAGAAAGGCTAAACCAGAGACAAAAATTGTTGGAATCAGGACAAGGGTGGTTTGAGGGACTG 7489  
VP62\_XMRV DQ399707 ATAGCATGGCTAAGCTAAGAGAAAGGCTAAACCAGAGACAAAAATTGTTGGAATCAGGACAAGGGTGGTTTGAGGGACTG 7478  
MCF1233\_MuLV U13766 ATAGCATGGCTAAGCTAAGAGAAAGGCTAAACCAGAGACAAAAATTGTTGGAATCAGGACAAGGGTGGTTTGAGGGACTG 7500

Majority TTTAACAGGTCCCCATGGTTCACGACCCTGATATCCACCATTATGGGCCCTCTGATAGTACTTTTATTAATCCTACTCTT  
7530 7540 7550 7560 7570 7580 7590 7600

JY\_MuLV TTTAACAGGTCCCCATGGTTCACGACCCTGATATCCACCATTATGGGCCCTCTGATAGTACTTTTATTAATCCTACTCTT 7579  
N417\_MuLV HQ246218 TTTAACAGGTCCCCATGGTTCACGACCCTGATATCCACCATTATGGGCCCTCTGATAGTACTTTTATTAATCCTACTCTT 7583  
DG75\_MuLV AF221065 TTTAACAGGTCCCCATGGTTCACGACCCTGATATCCACCATTATGGGCCCTCTGATAGTACTTTTATTAATCCTACTCTT 7569  
VP62\_XMRV DQ399707 TTTAACAGGTCCCCATGGTTCACGACCCTGATATCCACCATTATGGGCCCTCTGATAGTACTTTTATTAATCCTACTCTT 7558  
MCF1233\_MuLV U13766 TTTAACAGGTCCCCATGGTTCACGACCCTGATATCCACCATTATGGGCCCTCTGATAGTACTTTTATTAATCCTACTCTT 7580

Majority CGGACCCTGTATTCTCAACCGCTTGGTCCAGTTTGTAAAAGACAGAATTTCCGGTGGTGCAGGCCCTGGTTCTGACCCAAC  
7610 7620 7630 7640 7650 7660 7670 7680

JY\_MuLV CGGACCCTGTATTCTCAACCGCTTGGTCCAGTTTGTAAAAGACAGAATTTCCGGTGGTGCAGGCCCTGGTTCTGACCCAAC 7659  
N417\_MuLV HQ246218 CGGACCCTGTATTCTCAACCGCTTGGTCCAGTTTGTAAAAGACAGAATTTCCGGTGGTGCAGGCCCTGGTTCTGACCCAAC 7663  
DG75\_MuLV AF221065 CGGACCCTGTATTCTCAACCGCTTGGTCCAGTTTGTAAAAGACAGAATTTCCGGTGGTGCAGGCCCTGGTTCTGACCCAAC 7649  
VP62\_XMRV DQ399707 CGGACCCTGTATTCTCAACCGCTTGGTCCAGTTTGTAAAAGACAGAATTTCCGGTGGTGCAGGCCCTGGTTCTGACCCAAC 7638  
MCF1233\_MuLV U13766 CGGACCCTGTATTCTCAACCGCTTGGTCCAGTTTGTAAAAGACAGAATTTCCGGTGGTGCAGGCCCTGGTTCTGACCCAAC 7660



Majority AGTATCACCAACTCAAATCAATAGATCCAGAAGAAGTAGAATCGCGTGAATAAAAGATTTTATTCAGTTTCCAGAAAGAG  
7690 7700 7710 7720 7730 7740 7750 7760

JY\_MuLV AGTATCACCAACTCAAATCAATAGATCCAGAAGAAGTAGAATCGCGTGAATAAAAGATTTTATTCAGTTTCCAGAAAGAG 7739  
N417\_MuLV HQ246218 AGTATCACCAACTCAAATCAATAGATCCAGAAGAAGTAGAATCGCGTGAATAAAAGATTTTATTCAGTTTCCAGAAAGAG 7743  
DG75\_MuLV AF221065 AGTATCACCAACTCAAATCAATAGATCCAGAAGAAGTAGAATCGCGTGAATAAAAGATTTTATTCAGTTTCCAGAAAGAG 7729  
VP62\_XMRV DQ399707 AGTATCACCAACTCAAATCAATAGATCCAGAAGAAGTAGAATCGCGTGAATAAAAGATTTTATTCAGTTTCCAGAAAGAG 7718  
MCF1233\_MuLV U13766 AGTATCACCAACTCAAATCAATAGATCCAGAAGAAGTAGAATCGCGTGAATAAAAGATTTTATTCAGTTTCCAGAAAGAG 7740

Majority GGGGGAATGAAAGACCCACCATAAGGCTTAGCAAGCTAGCTGCAGTAACGCCATTTTGAAGGCATGAAAAAGTACCAG  
7770 7780 7790 7800 7810 7820 7830 7840

JY\_MuLV GGGGGAATGAAAGACCCACCATAAGGCTTAGCAAGCTAGCTGCAGTAACGCCATTTTGAAGGCATGAAAAAGTACCAG 7819  
N417\_MuLV HQ246218 GGGGGAATGAAAGACCCACCATAAGGCTTAGCAAGCTAGCTGCAGTAACGCCATTTTGAAGGCATGAAAAAGTACCAG 7823  
DG75\_MuLV AF221065 GGGGGAATGAAAGACCCACCATAAGGCTTAGCAAGCTAGCTGCAGTAACGCCATTTTGAAGGCATGAAAAAGTACCAG 7809  
VP62\_XMRV DQ399707 GGGGGAATGAAAGACCCACCATAAGGCTTAGCAAGCTAGCTGCAGTAACGCCATTTTGAAGGCATGAAAAAGTACCAG 7798  
MCF1233\_MuLV U13766 GGGGGAATGAAAGACCCACCATAAGGCTTAGCAAGCTAGCTGCAGTAACGCCATTTTGAAGGCATGAAAAAGTACCAG 7820

Majority AGCTGA-GTTCTCAAAGTXACAAGGAAGTTTAGTTAAAGAATA-----AGGCTGAAXAAXACTGGGACAG  
7850 7860 7870 7880 7890 7900 7910 7920

JY\_MuLV AGCTGA-GTTCTCAAAGTACACAAAGAAGTTTAGTTAAAGAATA-----AGGCTGAAXAAXACTGGGACAG 7884  
N417\_MuLV HQ246218 AGCTGA-GTTCTCAAAGTACACAAGGAAGTTTAGTTAAAGAATA-----AGGCTGAAXAAXACTGGGACAG 7888  
DG75\_MuLV AF221065 AGCTGA-GTTCTCAAAGTACACAAGGAAGTTTAGTTAAAGAATA-----AGGCTGAAXAAXACTGGGACAG 7888  
VP62\_XMRV DQ399707 AGCTGA-GTTCTCAAAGTACACAAGGAAGTTTAGTTAAAGAATA-----AGGCTGAAXAAXACTGGGACAG 7863  
MCF1233\_MuLV U13766 AGCTGA-GTTCTCAAAGTACACAAGGAAGTTTAGTTAAAGAATA-----AGGCTGAAXAAXACTGGGACAG 7883

Majority GGGCCAAACAGGATATCTGTGGTCGAGCACCTGGGCCCGGCTCAGGGCCAAGAACAGATGGTACTCAGATAAAGCGAAA  
7930 7940 7950 7960 7970 7980 7990 8000

JY\_MuLV GGGCCAAACAGGATATCTGTGGTCGAGCACCTGGGCCCGGCTCAGGGCCAAGAACAGATGGTACTCAGATAAAGCGAAA 7964  
N417\_MuLV HQ246218 GGGCCAAACAGGATATCTGTGGTCGAGCACCTGGGCCCGGCTCAGGGCCAAGAACAGATGGTACTCAGATAAAGCGAAA 7968  
DG75\_MuLV AF221065 GGGCCAAACAGGATATCTGTGGTCGAGCACCTGGGCCCGGCTCAGGGCCAAGAACAGATGGTACTCAGATAAAGCGAAA 7962  
VP62\_XMRV DQ399707 GGGCCAAACAGGATATCTGTGGTCGAGCACCTGGGCCCGGCTCAGGGCCAAGAACAGATGGTACTCAGATAAAGCGAAA 7943  
MCF1233\_MuLV U13766 GGGCCAAACAGGATATCTGTGGTCGAGCACCTGGGCCCGGCTCAGGGCCAAGAACAGATGGTACTCAGATAAAGCGAAA 7963

Majority CTAGCAACAGTTTCTGGAAA-GTCCCACCTCAGTTTCA-----AGTTCCCCAAAAGACCGGGAAAAACCCCAAGCCTT-  
8010 8020 8030 8040 8050 8060 8070 8080

JY\_MuLV CTAGCAACAGTTTCTGGAAA-GTCCCACCTCAGTTTCAAGGTCAGTTTCCCCAAAAGACCGGGAAAAACCCCAAGCCTT- 8042  
N417\_MuLV HQ246218 CTAGCAACAGTTTCTGGAAA-GTCCCACCTCAGTTTCA-----AGTTCCCCAAAAGACCGGGAAAAACCCCAAGCCTT- 8040  
DG75\_MuLV AF221065 CTAGCAACAGTTTCTGGAAA-GTCCCACCTCAGTTTCA-----AGTTCCCCAAAAGACCGGGAAAAACCCCAAGCCTT- 8036  
VP62\_XMRV DQ399707 CTAGCAACAGTTTCTGGAAA-GTCCCACCTCAGTTTCA-----AGTTCCCCAAAAGACCGGGAAAAACCCCAAGCCTT- 8015  
MCF1233\_MuLV U13766 CTAGCAACAGTTTCTGGAAA-GTCCCACCTCAGTTTCA-----AGTTCCCCAAAAGACCGGGAAAAACCCCAAGCCTT- 8035

Majority ATTTAAACTAACCAATCAGCTCGCTTCTCGTTCTGTACCCGCGCTTTTGTCTCCCGAG-----CCCTATAAAAA--GG  
8090 8100 8110 8120 8130 8140 8150 8160

JY\_MuLV ATTTAAACTAACCAATCAGCTCGCTTCTCGTTCTGTACCCGCGCTTTTGTCTCCCGAG-----CCCTATAAAAA--GG 8114  
N417\_MuLV HQ246218 ATTTAAACTAACCAATCAGCTCGCTTCTCGTTCTGTACCCGCGCTTTTGTCTCCCGAG-----CCCTATAAAAA--GG 8112  
DG75\_MuLV AF221065 ATTTAAACTAACCAATCAGCTCGCTTCTCGTTCTGTACCCGCGCTTTTGTCTCCCGAG-----CCCTATAAAAA--GG 8114  
VP62\_XMRV DQ399707 ATTTAAACTAACCAATCAGCTCGCTTCTCGTTCTGTACCCGCGCTTTTGTCTCCCGAG-----CCCTATAAAAA--GG 8095  
MCF1233\_MuLV U13766 ATTTAAACTAACCAATCAGCTCGCTTCTCGTTCTGTACCCGCGCTTTTGTCTCCCGAG-----CCCTATAAAAA--GG 8107

```
Majority      GTAAAAACCCACACTCGGCGGCCAGTCATCCGATAGACTGAGTCGCCCGGTACCCGTGTTCCCAATAAAGCCTTTTG
              8170      8180      8190      8200      8210      8220      8230      8240
JY_MuLV      GTAAAAACCCACACTCGGCGGCCAGTCATCCGATAGACTGAGTCGCCCGGTACCCGTGTTCCCAATAAAGCCTT 8191
N417_MuLV HQ246218 GTAAAAACCCACACTCGGCGGCCAGTCATCCGATAGACTGAGTCGCCCGGTACCCGTGTTCCCAATAAAGCCTT 8189
DG75_MuLV AF221065 GTAAGAACTCCACACTCGGCGGCCAGTCCTCCGATAGACTGAGTCGCCCGGTACCCGTGTTCCCAATAAAGCCTTTTG 8194
VP62_XMRV DQ399707 GTAAGAACTCCACACTCGGCGGCCAGTCATCCGATAGACTGAGTCGCCCGGTACCCGTGTTCCCAATAAAGCCTTTTG 8175
MCF1233_MuLV U13766 GTAAAAACCCACACTCGGCGGCCAGTCCTCCGATAGACTGAGTCGCCCGGTACCCGTGTTCCCAATAAAGCCTTTTG 8187
```

```
Majority      CTGXTTXCAXXX
              8250
```

```
JY_MuLV      8191
N417_MuLV HQ246218 8189
DG75_MuLV AF221065 CTGATTACATCCG 8207
VP62_XMRV DQ399707 CTGTTTCAA 8185
MCF1233_MuLV U13766 CTGTTTCA 8196
```

Decoration 'Decoration #1': Shade (with solid deep red) residues that differ from the Consensus.
