# Supplementary material
Source: PubMed Central journal article supplement (PMC3302299)
Supplement: supp_86.6.2970_FigS3.pdf [file supp_86.6.2970_FigS3.pdf]

MULV\_JY\_complete\_junctions

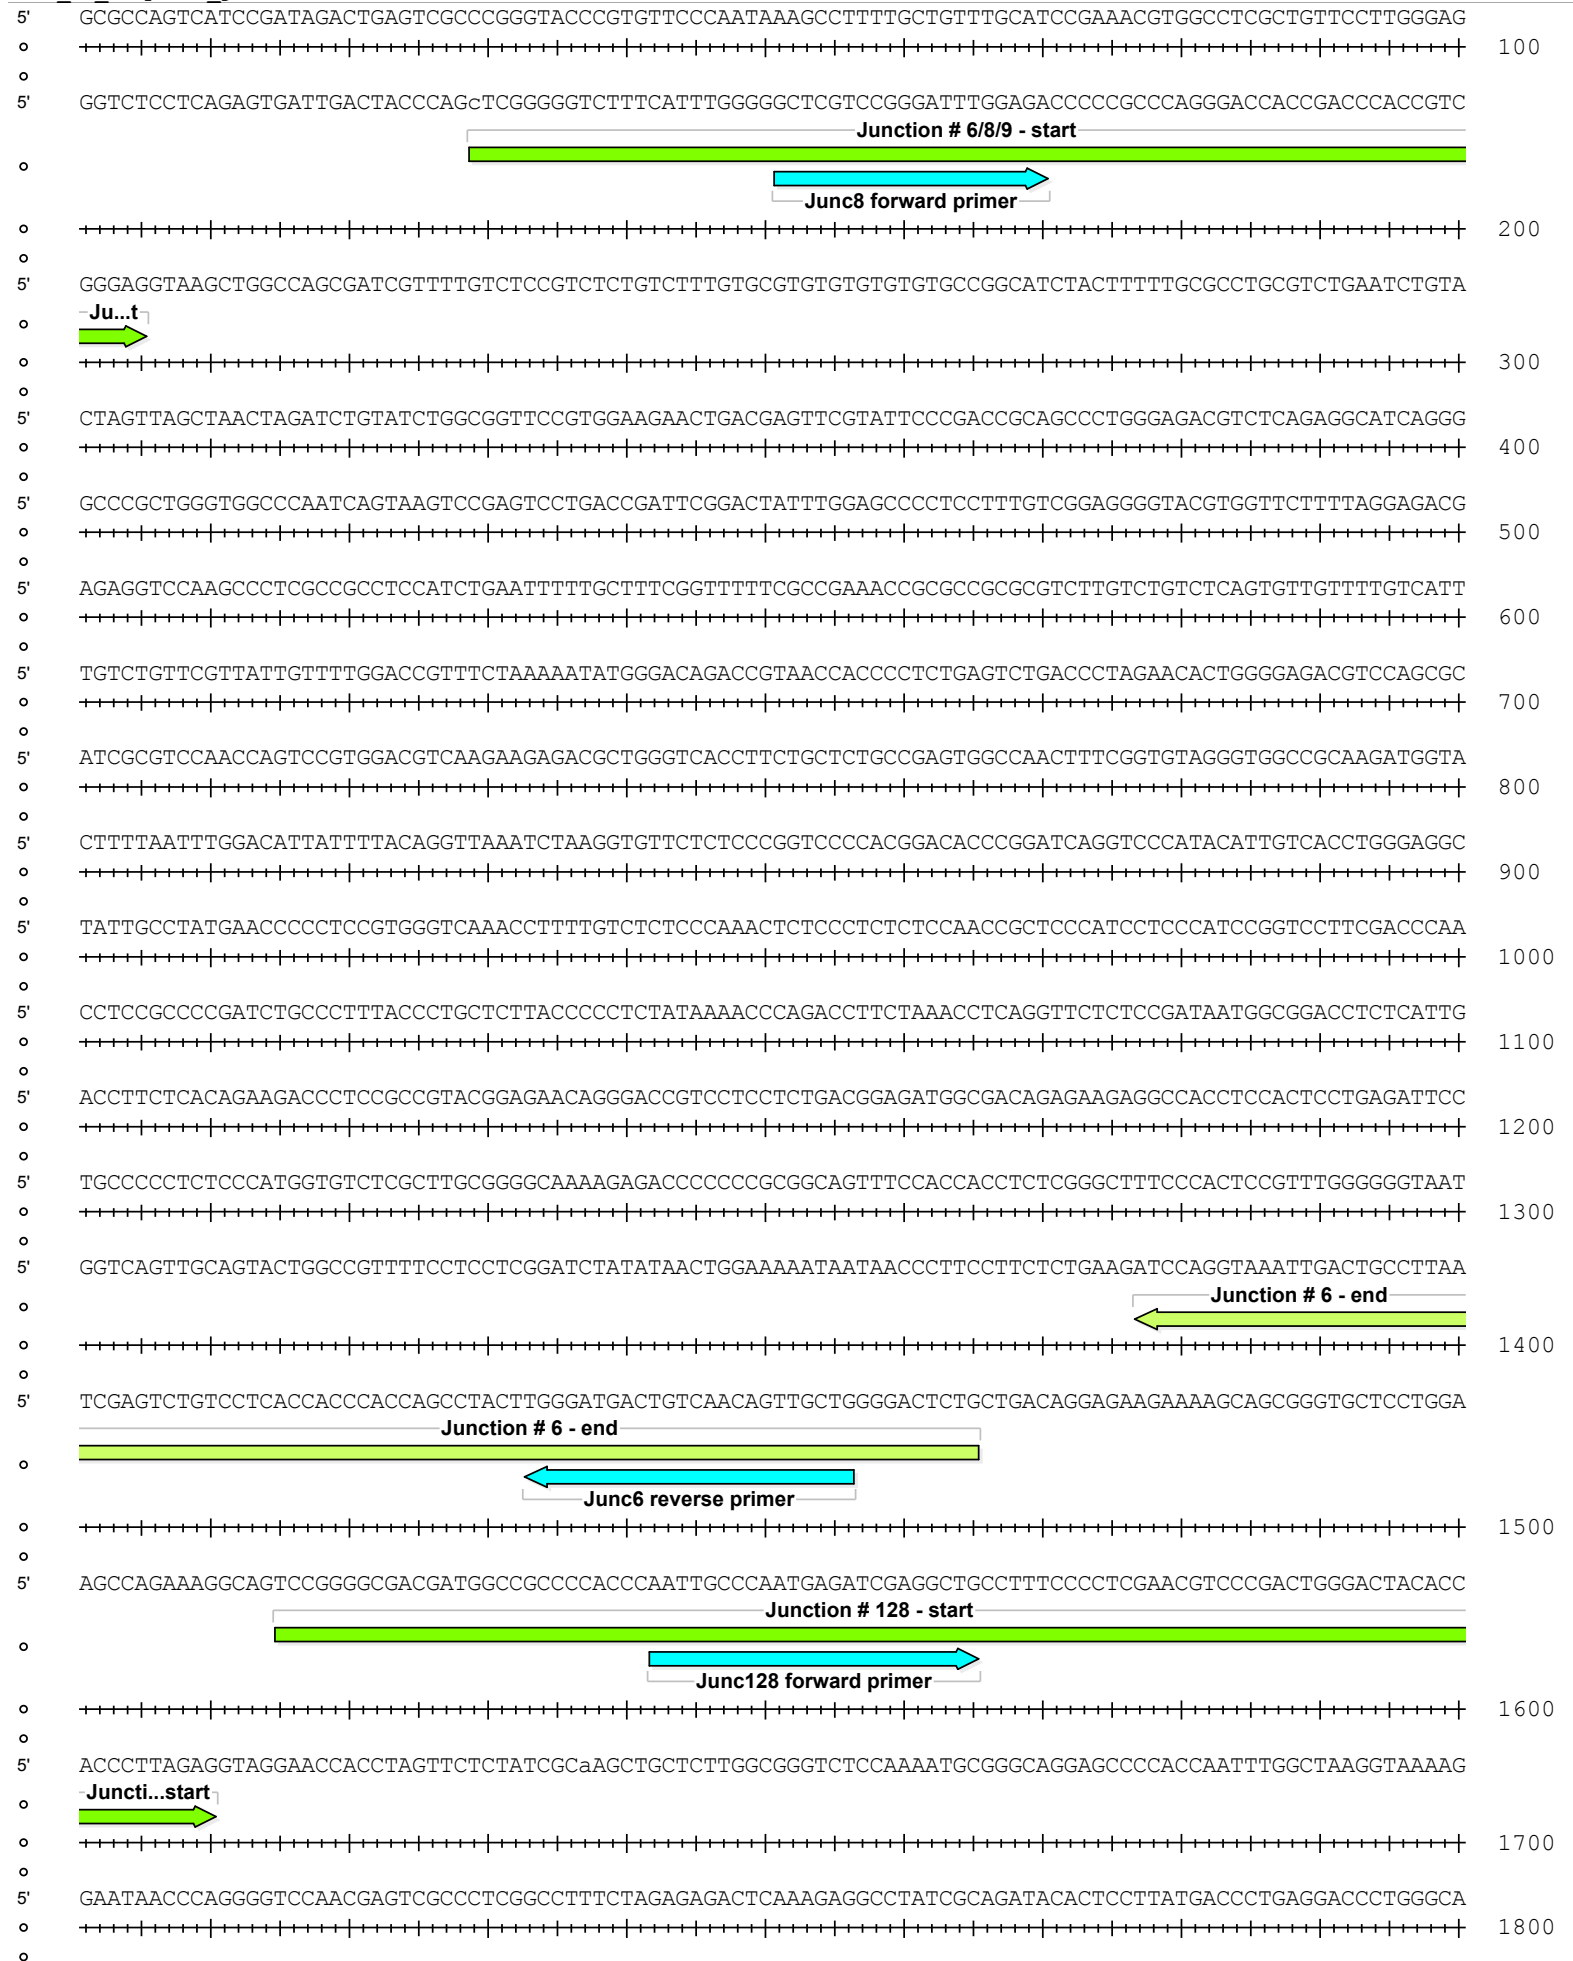

MULV\_JY\_complete\_junctions

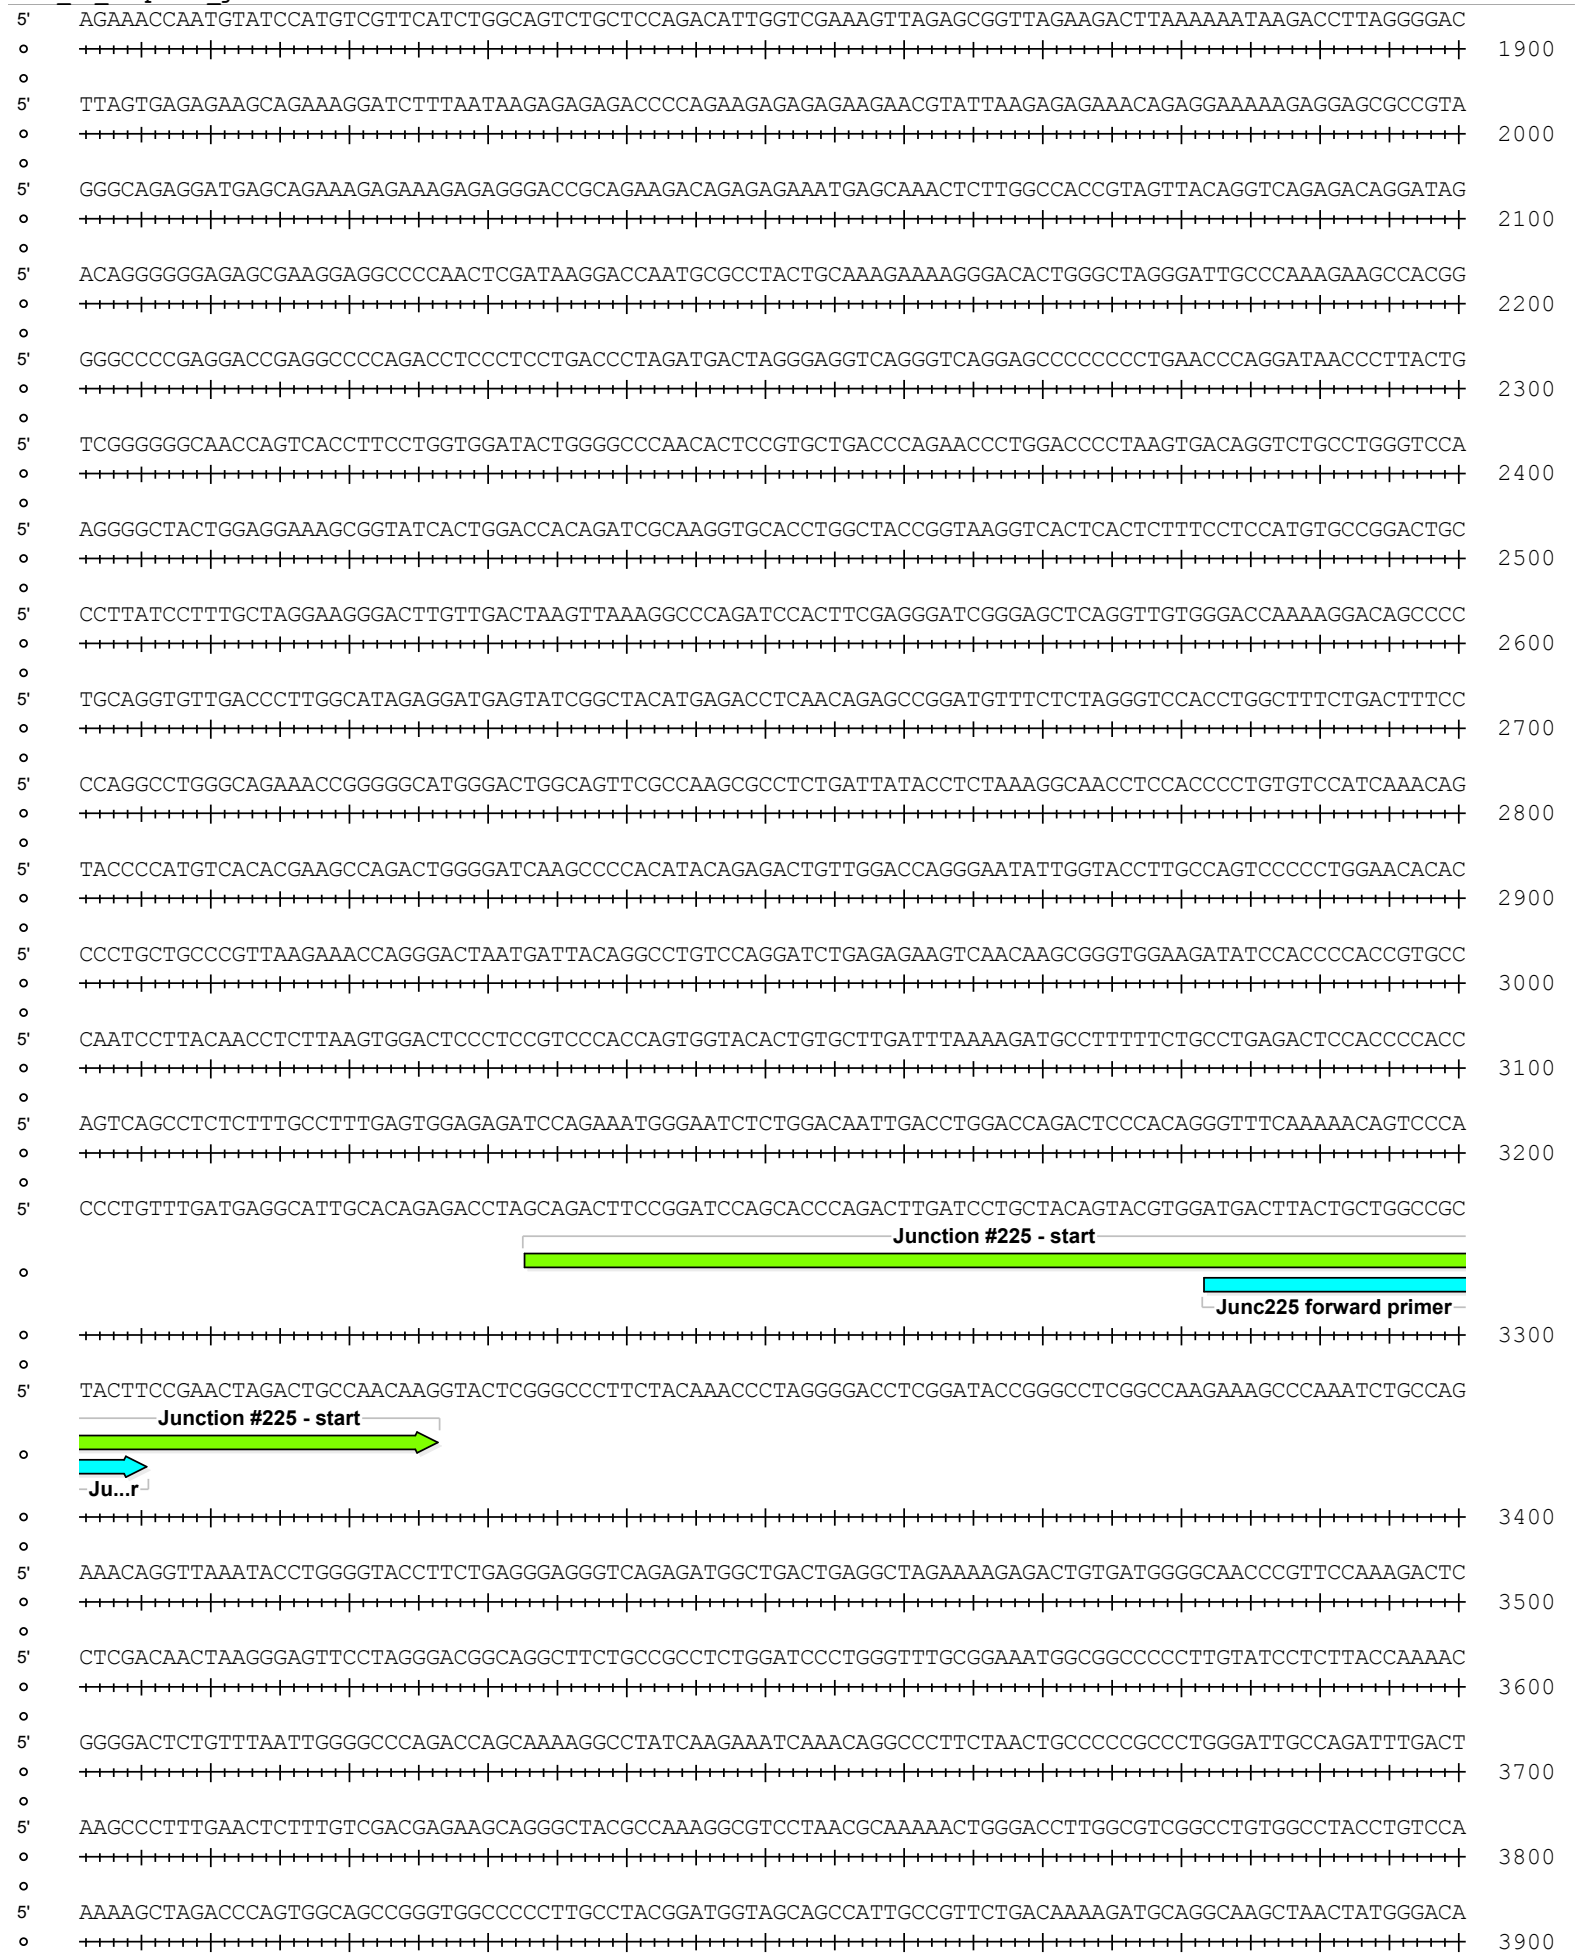

MULV\_JY\_complete\_junctions

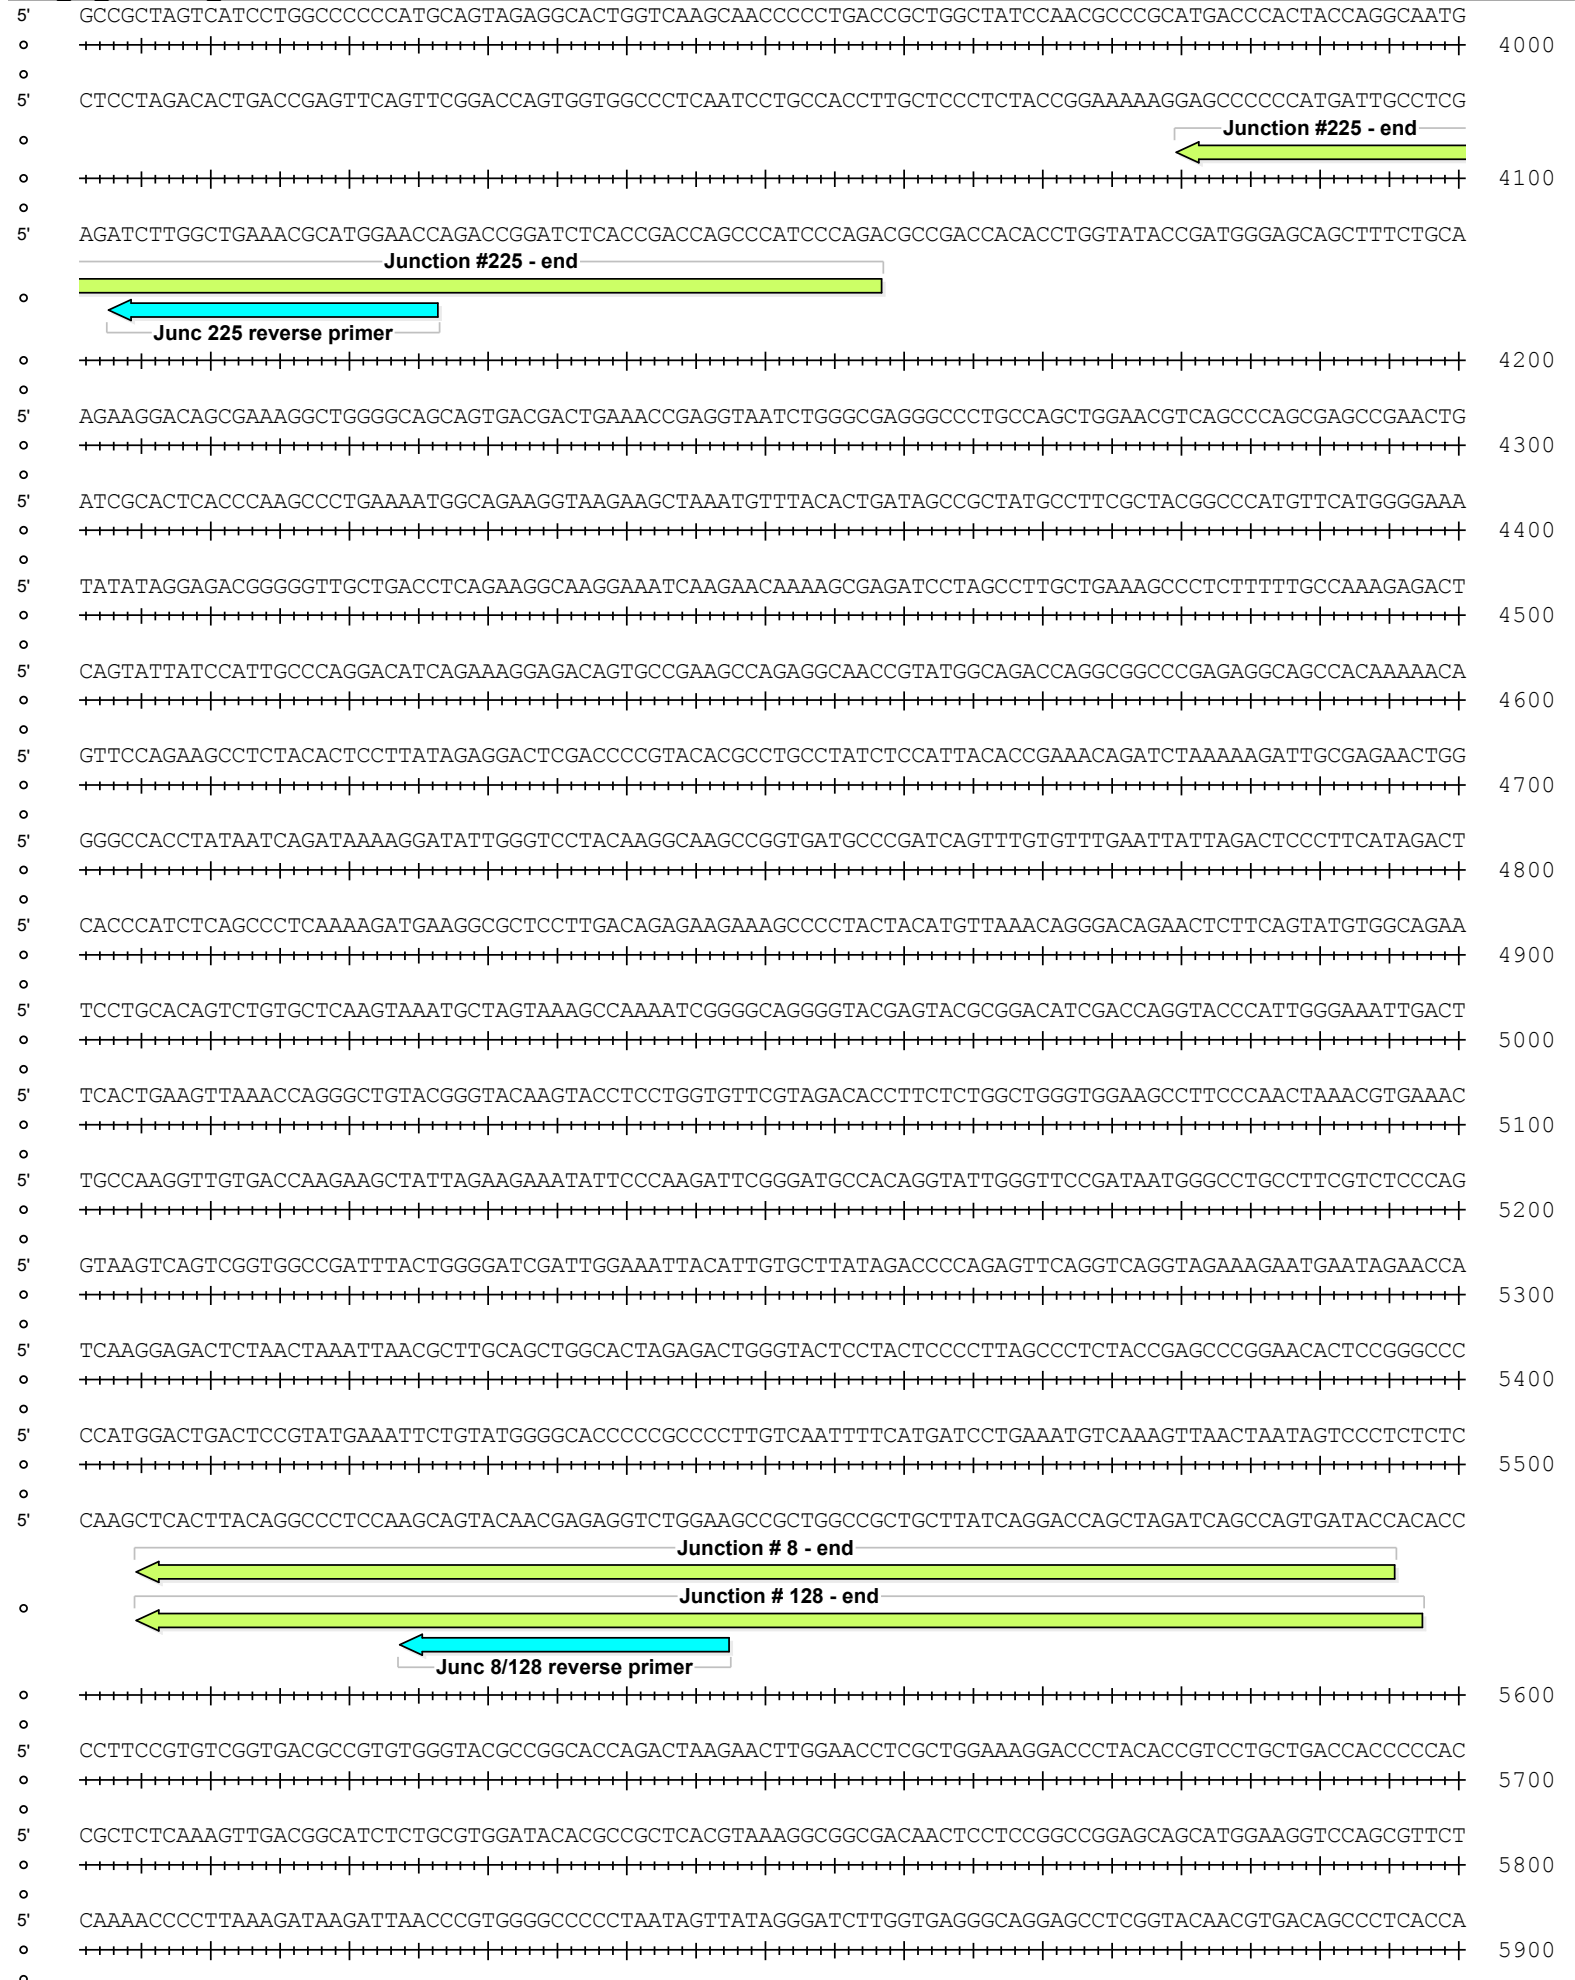

MULV\_JY\_complete\_junctions

|    |                                                                                                       |      |
|----|-------------------------------------------------------------------------------------------------------|------|
| 5' | GGTCTTCAATGTCACCTGGAGAGTTACCAACCTAATGACAGGACAAACAGCTAACGCTACCTCCCTCCTGGGGACGATGACAGACACCTTCCTAAACTA   | 6000 |
| o  | +                                                                                                     |      |
| o  |                                                                                                       |      |
| 5' | TATTTTGACTTGTGTGATTTAGTTGGAGACCATTGGGATGACCCAGAACCAGATATTGGAGATGGTTGCCGCTCTCCGGGGGAAGAAAAAGGACAAGAC   | 6100 |
| o  | +                                                                                                     |      |
| o  |                                                                                                       |      |
| 5' | TGTATGACTTCTATGTTTGCCTGGTCATACTGTACCAATAGGGTGTGGAGGGCCGGGAGAGGGCTACTGTGGCAAATGGGGATGTGAGACCACTGGACA   | 6200 |
| o  | +                                                                                                     |      |
| o  |                                                                                                       |      |
| 5' | GGCATACTGGAAGCCATCATCATCATGGGACCTAATTTCCCTTAAGCGAGGAAACACTCCTAAaGATCAGGGCCCCTGTTATGATTCCCTCGGTCTCCAGT | 6300 |
| o  | +                                                                                                     |      |
| o  |                                                                                                       |      |
| 5' | GGCGTCCAGGGTGCCACACCGGGGGTTCGATGCAACCCCTAGTCTTAGAATTCAGTACGCGGGTAAAAAGGCCAGCTGGGATGCCCCAAAGTTTGGG     | 6400 |
| o  | +                                                                                                     |      |
| o  |                                                                                                       |      |
| 5' | GACTAAGACTCTACCGATCCACGGGGCCGACCCGGTGACCCGGTTCTCTTTGACCCGCCAGGTCTCAATGTAGGACCCCGCTCCCCATTGGGCCTAA     | 6500 |
| o  | +                                                                                                     |      |
| o  |                                                                                                       |      |
| 5' | TCCCGTaaTCACTGAACAGCTACCCCCCTCCAACCCGTCAGATCATGCTCCCAGGCCTCCTCATCTCCTCCTCAGGCGCGCCTCTATGGTGCCT        | 6600 |
| o  | +                                                                                                     |      |
| o  |                                                                                                       |      |
| 5' | GGGGCTCCCCGCCTTCTCAACAACCTGGGACGGGGACAGGCTGCTAAACCTAGTAAAAGGAGCCTATCAAGCACTCAACCTCACCAGTCCCGACAGAA    | 6700 |
| o  | +                                                                                                     |      |
| o  |                                                                                                       |      |
| 5' | CCCAAGAGTGCTGGCTGTGTCTGGTATCGGGACCCCCCTACTACGAAGGGGTGCGCTCCTAGGTACCTACTCCAACCATACTCTGCCCCAGCTAACTG    | 6800 |
| o  | +                                                                                                     |      |
| o  |                                                                                                       |      |
| 5' | CTCCGTGCCTCCCAACACAAGCTGACCCTGTCCGAAGTGACCGGCAGGGACTCTGCGTAGGAGCAGTTCCCAAAACCATCAGGCCCTGTGTAATACC     | 6900 |
| o  | +                                                                                                     |      |
| o  |                                                                                                       |      |
| 5' | ACCCAGAAGGGGAGCGACGGGTCTACTATCTGGCTGCTCCCGCCGGGACCATCTGGGCTTGCAACACCGGGCTCACTCCCTGCCTATCTACCCTGTAC    | 7000 |
| o  | +                                                                                                     |      |
| o  |                                                                                                       |      |
| 5' | TCAACCTCACCACCGATTACTGTGCTCTGGTGTGAGCTCTGGCCAAAGGTGACCTACCCTCCCTGGTTATGTTTATGACCAGTTTGAGAGAAAAACCAA   | 7100 |
| o  | +                                                                                                     |      |
| o  |                                                                                                       |      |
| 5' | ATATAAAAGAGAGCCGGTGTCACTTAACCTCTGGCCCTGCTGTTGGGAGGACTTACTATGGCGGCATAGCTGCAGGAGTAGGAACAGGGACTACAGCCCTA | 7200 |
| o  | +                                                                                                     |      |
| o  |                                                                                                       |      |
| 5' | GTGGCCACCAAACAATTTCGAGCAGCTCCAGGCAGCCATACATACAGACCTTGGGGCCTTAGAAAAATCAGTCAGTGCCCTAGAAAAGTCTCTGACCTCGT | 7300 |
| o  | +                                                                                                     |      |
| o  |                                                                                                       |      |
| 5' | TGTCTGAGGTGGTCTACAGAACCGGAGAGGATTAGATCTGCTGTTCTAAAAGAAGGAGGATTATGTGCTGCCCTAAAAGAAGAATGCTGTTTCTATGC    | 7400 |
| o  | +                                                                                                     |      |
| o  |                                                                                                       |      |
| 5' | AGACCACACTGGCGTAGTAAGGGATAGCATGGCTAAGCTAAGAGAAAGGCTAAACCAGAGGCAAAAAATTGTTTCAATCAGGACAAGGGTGGTTTGGAGGA | 7500 |
| o  | +                                                                                                     |      |
| o  |                                                                                                       |      |
| 5' | CTGTTTAAACAGTCCCATGGTTCACGACCCTGATATCCACCATTATGGGCCCTCTGATAGTACTTTTATCCTACTCCTCGGACCCTGCATTCTCAACCG   | 7600 |
| o  | +                                                                                                     |      |
| o  |                                                                                                       |      |
| 5' | CTTGGTCCAGTTTGTAAAAGACAGAATTCGGTGGTGCAGGCCCTGGTTCGACCCAACAGTATCACCAACTCAAATCAATAGATCCAGAAGAAGTAGAA    | 7700 |
| o  | +                                                                                                     |      |
| o  |                                                                                                       |      |
| 5' | TCGCGTGAATAAAAGATTTTATTCAGTTTCCAGAAAGAGGGGGAATGAAAGACCCACCATAAGGCTTAGCAAGCTAGCTGCAGTAACGCCATTTTGCA    | 7800 |
| o  | +                                                                                                     |      |
| o  |                                                                                                       |      |
| 5' | AGGCATGAAAAGTACCAGAGCTGAGTCTCAAAGTCACAAaGAAGTTTAGTTAAAGAATAAGGCTGAACAAAACCTGGGACAGGGGCCAAACAGGATAT    | 7900 |
| o  | +                                                                                                     |      |
| o  |                                                                                                       |      |
| 5' | CTGTGGTTCGAGCACCTGGGCCCGGCTCAGGGCCAAGAACAGATGGTACTCAGATAAAGCGAAACTAGCAACAGTTTCTGGAAAGTCCCACCTCAGTTTC  | 8000 |
| o  | +                                                                                                     |      |
| o  |                                                                                                       |      |
| 5' | AgggTcaAGTTCCCCAAAAGACCGGAAAAACCCCAAGCCTTATTTAAACTAACCAATCAGCTCGCTTCTCGCTTCTGTAACCGGCTTTTGTCTCCCA     | 8100 |
| o  | +                                                                                                     |      |
| o  |                                                                                                       |      |
| 5' | GCCCTATAAAAAGGGTAAAAACCCACACTCGGTGCGCCAGTCATCCGATAGACTGAGTGCcCCGGGTACCCGTGTTCCCAATAAAGCCTT            | 8191 |
| o  | +                                                                                                     |      |
| o  |                                                                                                       |      |
