# Supplementary material
Source: PubMed Central journal article supplement (PMC3302299)
Supplement: supp_86.6.2970_FigS4.pdf [file supp_86.6.2970_FigS4.pdf]

|                       |                                                                                                                                                                                                                                |     |
|-----------------------|--------------------------------------------------------------------------------------------------------------------------------------------------------------------------------------------------------------------------------|-----|
| Majority              | MGQVTTPLSLTL <del>EH</del> WGDVQRIASNSQSV <del>DV</del> KRRRWVTFCSAEWPTFGV <del>GW</del> PQDGT <del>FN</del> LDIILQVKS <del>KV</del> FS <del>PG</del> PHGHPDQV                                                                 |     |
|                       | 10 20 30 40 50 60 70 80                                                                                                                                                                                                        |     |
| Full_length_gagpolpro | MGQVTTPLSLTL <del>EH</del> WGDVQRIASNSQSV <del>DV</del> KRRRWVTFCSAEWPTFGV <del>GW</del> PQDGT <del>FN</del> LDIILQVKS <del>KV</del> FS <del>PG</del> PHGHPDQV                                                                 | 80  |
| Spliced_gagpolpro     | MGQVTTPLSLTL <del>EH</del> WGDVQRIASNSQSV <del>DV</del> KRRRWVTFCSAEWPTFGV <del>GW</del> PQDGT <del>FN</del> LDIILQVKS <del>KV</del> FS <del>PG</del> PHGHPDQV                                                                 | 80  |
| Majority              | PYIVTWEAIA <del>YE</del> PPPVW <del>KP</del> VFVSPKLSLSPTAPILPSGPSTQPP <del>PR</del> SALYPALTPSIK <del>PR</del> PSK <del>PQ</del> VLS <del>DNG</del> GPLIDLLTED                                                                |     |
|                       | 90 100 110 120 130 140 150 160                                                                                                                                                                                                 |     |
| Full_length_gagpolpro | PYIVTWEAIA <del>YE</del> PPPVW <del>KP</del> VFVSPKLSLSPTAPILPSGPSTQPP <del>PR</del> SALYPALTPSIK <del>PR</del> PSK <del>PQ</del> VLS <del>DNG</del> GPLIDLLTED                                                                | 160 |
| Spliced_gagpolpro     | PYIVTWEAIA <del>YE</del> PPPVW <del>KP</del> VFVSPKLSLSPTAPILPSGPSTQPP <del>PR</del> SALYPALTPSIK <del>PR</del> PSK <del>PQ</del> VLS <del>DNG</del> GPLIDLLTED                                                                | 160 |
| Majority              | PPPYEQG <del>PS</del> SSDGDG <del>DRE</del> EATSTPEIPAPSPM <del>VS</del> R <del>LR</del> GRKRDPPAAVSTTS <del>RA</del> FPLRLGG <del>NG</del> QLQYWP <del>FSS</del> SDLYNWKNN                                                    |     |
|                       | 170 180 190 200 210 220 230 240                                                                                                                                                                                                |     |
| Full_length_gagpolpro | PPPYEQG <del>PS</del> SSDGDG <del>DRE</del> EATSTPEIPAPSPM <del>VS</del> R <del>LR</del> GRKRDPPAAVSTTS <del>RA</del> FPLRLGG <del>NG</del> QLQYWP <del>FSS</del> SDLYNWKNN                                                    | 240 |
| Spliced_gagpolpro     | PPPYEQG <del>PS</del> SSDGDG <del>DRE</del> EATSTPEIPAPSPM <del>VS</del> R <del>LR</del> GRKRDPPAAVSTTS <del>RA</del> FPLRLGG <del>NG</del> QLQYWP <del>FSS</del> SDLYNWKNN                                                    | 240 |
| Majority              | NPSFSEDPGKLTALIESVL <del>TTH</del> QPTWDDCQ <del>LL</del> GTLLT <del>GEE</del> KQ <del>RV</del> LLEARKAV <del>RGD</del> GRPTQLPNEIEA <del>AF</del> PLERP <del>DW</del> DY                                                      |     |
|                       | 250 260 270 280 290 300 310 320                                                                                                                                                                                                |     |
| Full_length_gagpolpro | NPSFSEDPGKLTALIESVL <del>TTH</del> QPTWDDCQ <del>LL</del> GTLLT <del>GEE</del> KQ <del>RV</del> LLEARKAV <del>RGD</del> GRPTQLPNEIEA <del>AF</del> PLERP <del>DW</del> DY                                                      | 320 |
| Spliced_gagpolpro     | NPSFSEDPGKLTALIESVL <del>TTH</del> QPTWDDCQ <del>LL</del> GTLLT <del>GEE</del> KQ <del>RV</del> LLEARKAV <del>RGD</del> GRPTQLPNEIEA <del>AF</del> PLERP <del>DW</del> DY                                                      | 320 |
| Majority              | TTLRGRNHLV <del>YR</del> KLLLAGLQ <del>NA</del> GRSPTNLAKV <del>KG</del> ITQGSNE <del>SP</del> SAFLERLKEAY <del>RR</del> YTPYD <del>PE</del> DPGQET <del>NV</del> SMSFIWQS                                                     |     |
|                       | 330 340 350 360 370 380 390 400                                                                                                                                                                                                |     |
| Full_length_gagpolpro | TTLRGRNHLV <del>YR</del> KLLLAGLQ <del>NA</del> GRSPTNLAKV <del>KG</del> ITQGSNE <del>SP</del> SAFLERLKEAY <del>RR</del> YTPYD <del>PE</del> DPGQET <del>NV</del> SMSFIWQS                                                     | 400 |
| Spliced_gagpolpro     | TTLRGRNHLV <del>YR</del> KLLLAGLQ <del>NA</del> GRSPTNLAKV <del>KG</del> ITQGSNE <del>SP</del> SAFLERLKEAY <del>RR</del> YTPYD <del>PE</del> DPGQET <del>NV</del> SMSFIWQS                                                     | 400 |
| Majority              | APDIGR <del>KL</del> ERLEDLKNKTLGDLV <del>REA</del> ERIFNK <del>RE</del> TPEEREERIK <del>RE</del> TEEKEERR <del>AE</del> DEQKEKER <del>DRR</del> RQREMSKLLATV                                                                  |     |
|                       | 410 420 430 440 450 460 470 480                                                                                                                                                                                                |     |
| Full_length_gagpolpro | APDIGR <del>KL</del> ERLEDLKNKTLGDLV <del>REA</del> ERIFNK <del>RE</del> TPEEREERIK <del>RE</del> TEEKEERR <del>AE</del> DEQKEKER <del>DRR</del> RQREMSKLLATV                                                                  | 480 |
| Spliced_gagpolpro     | APDIGR <del>KL</del> ERLEDLKNKTLGDLV <del>REA</del> ERIFNK <del>RE</del> TPEEREERIK <del>RE</del> TEEKEERR <del>AE</del> DEQKEKER <del>DRR</del> RQREMSKLLATV                                                                  | 480 |
| Majority              | VTGQRQ <del>DR</del> QGERRRRQLDKDQ <del>CAY</del> CKEKGHW <del>ARD</del> CPK <del>KPR</del> GRGPRPQTSL <del>LL</del> TDDQGGQ <del>GQ</del> EP <del>PE</del> PRITLTVGGQPV                                                       |     |
|                       | 490 500 510 520 530 540 550 560                                                                                                                                                                                                |     |
| Full_length_gagpolpro | VTGQRQ <del>DR</del> QGERRRRQLDKDQ <del>CAY</del> CKEKGHW <del>ARD</del> CPK <del>KPR</del> GRGPRPQTSL <del>LL</del> TDDQGGQ <del>GQ</del> EP <del>PE</del> PRITLTVGGQPV                                                       | 560 |
| Spliced_gagpolpro     | VTGQRQ <del>DR</del> QGERRRRQLDKDQ <del>CAY</del> CKEKGHW <del>ARD</del> CPK <del>KPR</del> GRGPRPQTSL <del>LL</del> TDDQGGQ <del>GQ</del> EP <del>PE</del> PRITLTVGGQPV                                                       | 560 |
| Majority              | TFLVDTGA <del>QHS</del> VL <del>TQ</del> NPGLSD <del>RS</del> AWVQ <del>AT</del> G <del>GK</del> KRYH <del>WT</del> DRKVHLATGKV <del>TH</del> SFLHVPDC <del>PY</del> PLGRD <del>LL</del> TKLKAQIHF                             |     |
|                       | 570 580 590 600 610 620 630 640                                                                                                                                                                                                |     |
| Full_length_gagpolpro | TFLVDTGA <del>QHS</del> VL <del>TQ</del> NPGLSD <del>RS</del> AWVQ <del>AT</del> G <del>GK</del> KRYH <del>WT</del> DRKVHLATGKV <del>TH</del> SFLHVPDC <del>PY</del> PLGRD <del>LL</del> TKLKAQIHF                             | 640 |
| Spliced_gagpolpro     | TFLVDTGA <del>QHS</del> VL <del>TQ</del> NPGLSD <del>RS</del> AWVQ <del>AT</del> G <del>GK</del> KRYH <del>WT</del> DRKVHLATGKV <del>TH</del> SFLHVPDC <del>PY</del> PLGRD <del>LL</del> TKLKAQIHF                             | 640 |
| Majority              | EGSGAQ <del>VV</del> GPKGQPLQVLT <del>GI</del> ED <del>YR</del> LHETSTEP <del>DV</del> SLG <del>ST</del> WLSDFPQ <del>AW</del> AETGGMGLAV <del>RQ</del> APLI <del>IP</del> LKATSTP <del>VS</del> IK                            |     |
|                       | 650 660 670 680 690 700 710 720                                                                                                                                                                                                |     |
| Full_length_gagpolpro | EGSGAQ <del>VV</del> GPKGQPLQVLT <del>GI</del> ED <del>YR</del> LHETSTEP <del>DV</del> SLG <del>ST</del> WLSDFPQ <del>AW</del> AETGGMGLAV <del>RQ</del> APLI <del>IP</del> LKATSTP <del>VS</del> IK                            | 720 |
| Spliced_gagpolpro     | EGSGAQ <del>VV</del> GPKGQPLQVLT <del>GI</del> ED <del>YR</del> LHETSTEP <del>DV</del> SLG <del>ST</del> WLSDFPQ <del>AW</del> AETGGMGLAV <del>RQ</del> APLI <del>IP</del> LKATSTP <del>VS</del> IK                            | 720 |
| Majority              | QY <del>PM</del> SH <del>EA</del> RLGIKPHIQ <del>RL</del> LDQ <del>GI</del> L <del>VP</del> CQSPWNTPLLPV <del>KK</del> PGTNDY <del>RP</del> VQDL <del>RE</del> VNKRVEDIHPTV <del>PN</del> PYNLLSGLPPS                          |     |
|                       | 730 740 750 760 770 780 790 800                                                                                                                                                                                                |     |
| Full_length_gagpolpro | QY <del>PM</del> SH <del>EA</del> RLGIKPHIQ <del>RL</del> LDQ <del>GI</del> L <del>VP</del> CQSPWNTPLLPV <del>KK</del> PGTNDY <del>RP</del> VQDL <del>RE</del> VNKRVEDIHPTV <del>PN</del> PYNLLSGLPPS                          | 800 |
| Spliced_gagpolpro     | QY <del>PM</del> SH <del>EA</del> RLGIKPHIQ <del>RL</del> LDQ <del>GI</del> L <del>VP</del> CQSPWNTPLLPV <del>KK</del> PGTNDY <del>RP</del> VQDL <del>RE</del> VNKRVEDIHPTV <del>PN</del> PYNLLSGLPPS                          | 800 |
| Majority              | HQ <del>WY</del> TVL <del>DL</del> KDAFF <del>CL</del> RLHPT <del>SQ</del> PLFAF <del>EW</del> RDPEM <del>GI</del> SGQLTW <del>TR</del> LPQ <del>GF</del> KNSPTLF <del>DE</del> ALHRDLADFRI <del>QH</del> PD <del>IL</del> LQY |     |
|                       | 810 820 830 840 850 860 870 880                                                                                                                                                                                                |     |
| Full_length_gagpolpro | HQ <del>WY</del> TVL <del>DL</del> KDAFF <del>CL</del> RLHPT <del>SQ</del> PLFAF <del>EW</del> RDPEM <del>GI</del> SGQLTW <del>TR</del> LPQ <del>GF</del> KNSPTLF <del>DE</del> ALHRDLADFRI <del>QH</del> PD <del>IL</del> LQY | 880 |
| Spliced_gagpolpro     | HQ <del>WY</del> TVL <del>DL</del> KDAFF <del>CL</del> RLHPT <del>SQ</del> PLFAF <del>EW</del> RDPEM <del>GI</del> SGQLTW <del>TR</del> LPQ <del>GF</del> KNSPTLF <del>DE</del> ALHRDLADFRI <del>QH</del> PD <del>IL</del> LQY | 880 |
| Majority              | V <del>DD</del> LLAATSELD <del>CQ</del> G <del>XX</del> XXXXXXXXXXXXXXXXXXXXXXXXXXXXXXXXXXXXXXXXXXXXXXXXXXXXXXXXXXXX                                                                                                           |     |
|                       | 890 900 910 920 930 940 950 960                                                                                                                                                                                                |     |
| Full_length_gagpolpro | V <del>DD</del> LLAATSELD <del>CQ</del> G <del>XX</del> XXXXXXXXXXXXXXXXXXXXXXXXXXXXXXXXXXXXXXXXXXXXXXXXXXXXXXXXXXXX                                                                                                           | 960 |
| Spliced_gagpolpro     | V <del>DD</del> LLAATSELD <del>CQ</del> G-----                                                                                                                                                                                 | 897 |
