# Supplementary material
Source: PubMed Central journal article supplement (PMC3302299)
Supplement: supp_86.6.2970_TableS1.pdf [file supp_86.6.2970_TableS1.pdf]

| Table S1: RT-PCR primers used for MuLV analysis                              |                                |                                |
|------------------------------------------------------------------------------|--------------------------------|--------------------------------|
| Gene                                                                         | Forward primer                 | Reverse primer                 |
| MuLV                                                                         | 5'-CTGAGAGAAGTCAACAAGCG-3'     | 5'-CTGGATCTCTCCACTCAAAGGC-3'   |
| GAPDH                                                                        | 5'-GAAATCCCATCACCATCTTCCAGG-3' | 5'-GAGCCCCAGCCTTCTCCATG-3'     |
|                                                                              |                                |                                |
| <u>MuLV Junction</u>                                                         | Forward Primer                 | Reverse Primer                 |
| Junc 6                                                                       | 5'-GCTCGTCCGGGATTTGGAGA-3'     | 5'-CAGCAACTGTTGACAGTCATCCCA-3' |
| Junc 8                                                                       | 5'-GCTCGTCCGGGATTTGGAGA-3'     | 5'-TTCCAGACCTCTCGTTGTACTGCT-3' |
| Junc 128                                                                     | 5'-AATTGCCCAATGAGATCGAGGCTG-3' | 5'-TTCCAGACCTCTCGTTGTACTGCT-3' |
| Junc 225                                                                     | 5'-ATGACTTACTGCTGGCCGCTACTT-3' | 5'-GGTTCCATGCGTTTCAGCCAAGAT-3' |
| Reference for GAPDH primer: West et al, JBC 2004, Vol 279, (28): 28896-28902 |                                |                                |
