# Supplementary material
Source: PubMed Central journal article supplement (PMC3302299)

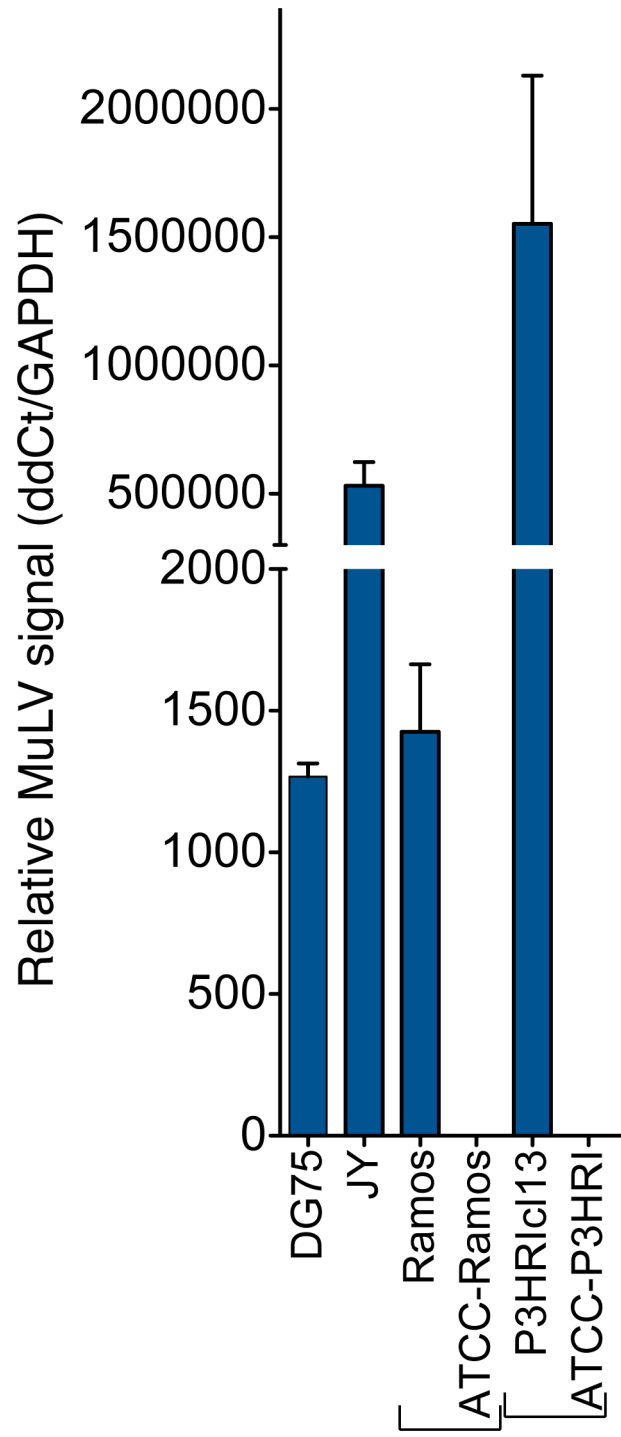

Supplement: supp_86.6.2970_FigS5.pdf [file supp_86.6.2970_FigS5.pdf]
